# Supplementary material for: A highly selective and potent CXCR4 antagonist for hepatocellular carcinoma treatment
Source: Proc Natl Acad Sci U S A. 2021 Mar 22;118(13):e2015433118. doi: 10.1073/pnas.2015433118 (PMC8020795; doi:10.1073/pnas.2015433118)
Supplement: Supplementary File [file pnas.2015433118.sapp.pdf]

## **Supplementary Information**

### **A Highly Selective and Potent CXCR4 Antagonist for Hepatocellular Carcinoma Treatment**

Jen-Shin Song, Chih-Chun Chang, Chien-Huang Wu, Trinh Kieu Dinh, Jiing-Jyh Jan, Kuan-Wei Huang, Ming-Chen Chou, Ting-Yun Shiue, Kai-Chia Yeh, Yi-Yu Ke, Teng-Kuang Yeh, Yen-Nhi Ngoc Ta, Chia-Jui Lee, Jing-Kai Huang, Yun-Chieh Sung, Kak-Shan Shia\* and Yunching Chen\*

## Table of Contents

|                                                                                               |         |
|-----------------------------------------------------------------------------------------------|---------|
| Materials and Methods .....                                                                   | S3-S16  |
| Synthetic procedures of BPRCX807 .....                                                        | S4-S6   |
| Synthetic procedures of Linker 1 .....                                                        | S6-S10  |
| Wound healing and invasion assays.....                                                        | S10     |
| Human CXCR4-binding assay .....                                                               | S10-S11 |
| Pharmacokinetics and toxicology studies .....                                                 | S11     |
| Cytochrome P450 testing.....                                                                  | S11-S12 |
| <i>In vivo</i> hepatocellular carcinoma treatment studies.....                                | S12     |
| <i>In vivo</i> chemical-induced HCC mice models.....                                          | S12     |
| Molecular docking protocol of ligand-CXCR4 receptor binding.....                              | S12-S13 |
| Hematoxylin and Eosin staining.....                                                           | S13     |
| Flow cytometry analysis.....                                                                  | S13-S14 |
| Western blot analysis.....                                                                    | S14     |
| Reverse transcription quantitative real time PCR.....                                         | S14-15  |
| Off-target standard assays.....                                                               | S15     |
| <i>hERG</i> patch-clamp assay.....                                                            | S15     |
| Selectivity screening of various chemokine receptors.....                                     | S15-S16 |
| Statistics.....                                                                               | S16     |
| References .....                                                                              | S17     |
| Figure S1. Binding affinity and chemotaxis inhibition assay of BPRCX807.....                  | S18     |
| Figure S2. CXCR4 <sup>+</sup> CD34 <sup>+</sup> stem cell mobilization.....                   | S18     |
| Figure S3. The plasma concentration profile (AUC) of BPRCX807 and AMD3100 .....               | S19     |
| Figure S4. The metabolic stabilities of BPRCX807 in liver microsomes.....                     | S19     |
| Figure S5. Inhibitory values IC <sub>50</sub> of BPRCX807 on 6 human liver P450 isozymes..... | S20     |
| Figure S6. BPRCX807 suppresses CXCL12/CXCR4 axis-mediated migration of HCC cells.....         | S21     |
| Figure S7. BPRCX807 inhibits the EMT phenotype of HCA-1 cells under hypoxic conditions.....   | S22     |
| Figure S8. DEN/CCl4-induced liver fibrosis associated HCC model.....                          | S23     |

|                                                                                                   |         |
|---------------------------------------------------------------------------------------------------|---------|
| Figure S9. Synergistic effects of AMD11070 with immune therapy in the orthotopic HCA-1 model..... | S24     |
| Figure S10. AMD11070 moderately inhibited CXCL12-mediated cell signaling pathways.....            | S25     |
| <sup>1</sup> H and <sup>13</sup> C NMR spectra for all new compounds .....                        | S26-S37 |
| Purity of BPRCX807 by HPLC analysis.....                                                          | S38-S39 |
| Table S1. Organ weight measurement of BPRCX807.....                                               | S40     |
| Table S2. Hematology analysis of BPRCX807.....                                                    | S41     |
| Table S3. Biochemistry analysis of BPRCX807.....                                                  | S42     |
| Table S4. 67 Off-target assays of BPRCX807.....                                                   | S43-S44 |
| Table S5. <i>hERG</i> patch-clamp assay of BPRCX807.....                                          | S45     |
| Table S6. Selectivity screening of various chemokine receptors.....                               | S46     |

## Materials and Methods

Sorafenib was purchased from Selleck Chemicals (Houston, TX). AMD3100 was purchased from Sigma Aldrich (St. Louis, MO). Anti-PD-1 was purchased from BioXcell (BE0146). AMD11070 (97% purity) in free base was purchased from ASTA Technologies (Bristol, PA), which was converted into hydrochloride salt prior to use. Unless otherwise stated, all chemical materials used were commercially available and used as supplied. Reactions requiring anhydrous conditions were performed in flame-dried glassware and cooled under an argon or nitrogen atmosphere. Unless otherwise stated, reactions were carried out under argon or nitrogen and monitored by analytical thin layer chromatography performed on glass-backed plates (5 × 10 cm) precoated with silica gel 60 F254 as supplied by Merck. Visualization of the resulting chromatograms was performed by looking under an ultraviolet lamp ( $\lambda = 254$  nm) followed by dipping in an ethanol solution of vanillin (5% w/v) containing sulfuric acid (3% v/v) or phosphomolybdic acid (2.5% w/v) and charring with a heat gun. Flash chromatography was used routinely for purification and separation of product mixtures using silica gel 60 of 230–400 mesh size as supplied by Merck. Eluent systems were given in volume/volume concentrations. Melting points were determined using a KRUSS KIP1N melting point meter.  $^1\text{H}$  and  $^{13}\text{C}$  NMR spectra were recorded on a Varian Mercury-300 (300 MHz) and a Varian Mercury-400 (400 MHz). Chloroform- $d$ , methanol- $d_4$  or deuterium oxide- $d_2$  was used as the solvent and TMS ( $\delta$  0.00 ppm) as an internal standard. Chemical shift values were reported in ppm relative to the TMS in delta ( $\delta$ ) units. Multiplicities are recorded as s (singlet), br s (broad singlet), d (doublet), t (triplet), q (quartet), dd (doublet of doublets), dt (doublet of triplets), and m (multiplet). Coupling constants ( $J$ ) were expressed in Hz. Melting points were measured using an Electrothermal instrument. Electrospray mass spectra (ESMS) were recorded as  $m/z$  values using an Agilent 1100 MSD mass spectrometer. The purity of compounds was determined by an Agilent 1100 series HPLC system using a C18 column (Thermo Fisher 5  $\mu\text{m}$  Hypersil Gold, 4.6 × 250 mm). A gradient system mixed with two eluting solvents A (water with 0.1% TFA) and B (MeOH) using a flow rate of 1 mL/min starting with 2 min at 10% solvent B, followed by a 4 min gradient of 10–50% solvent B, followed by a 10 minute gradient of 50–90% solvent B, followed by 9 min at 90% solvent B. Peaks were detected at 254 nm. IUPAC nomenclature of compounds was determined with ACD/Name Pro software.

## Synthetic procedures and spectral characterization for intermediates and BPRCX807

### **1-[4-(2-Chloro-6-methyl-pyrimidin-4-ylamino)-piperidin-1-yl]-2,2,2-trifluoro-ethanone**

(1). To a magnetically stirred solution of 2,4-dichloro-6-methylpyrimidine (0.82 g, 5.0 mmol) and hydrochloride salt of 4-amino-1-trifluoroacetyl piperidine (1.21 g, 5.2 mmol) in THF (30 mL) was added TEA (1.02 g, 10.1 mmol) slowly at 5 °C. The resulting mixture was allowed to warm to room temperature and stirred for 16 h. The reaction mixture was quenched with sat.  $\text{NH}_4\text{Cl}_{(\text{aq})}$  and then extracted with ethyl acetate. The combined organic extracts were washed with brine, dried over anhydrous sodium sulfate, filtered, and concentrated. The residue thus obtained was purified by flash chromatography on silica gel with *n*-hexane/ethyl acetate (1:1) to give compound **1** (0.75 g, 46%). mp 160.2-160.7 °C.  $^1\text{H}$  NMR (300 MHz,  $\text{CDCl}_3$ )  $\delta$  6.09 (s, 1H), 5.41 (d,  $J = 7.8$  Hz, NH), 4.43 (m, 1H), 4.10 (m, 1H), 3.97 (m, 1H), 3.29 (m, 1H), 3.00 (m, 1H), 2.27 (s, 3H), 2.13 (m, 2H), 1.44 (m, 2H).  $^{13}\text{C}$  NMR (75 MHz,  $\text{CDCl}_3$ )  $\delta$  167.4, 163.2, 160.5, 155.6 (q,  $J = 35.5$  Hz), 116.6 (q,  $J = 286.3$  Hz), 102.1, 47.4, 44.6, 42.6, 32.4, 31.5, 23.7. ESMS  $m/z$ : 323.1 (M+1).

### **[3-(*tert*-Butoxycarbonyl-cyclohexyl-amino)-propyl]-[3-[2-([4-methyl-6-[1-(2,2,2-trifluoro-acetyl)-piperidin-4-ylamino]-pyrimidin-2-ylamino)-methyl]-oxazol-4-yl]-**

**propyl}-carbamic acid *tert*-butyl ester (2).** A mixture of compound **1** (0.96 g, 3.0 mmol) and Linker 1 (1.50 g, 3.0 mmol) in 2-pentanol (45 mL) was sealed and heated at 140 °C for 15 h. The mixture was concentrated under reduced pressure to give a crude residue, which was purified by flash chromatography on silica gel with MeOH/ethyl acetate (1:9) to afford **2** (1.46 g, 63%).  $^1\text{H}$  NMR (400 MHz,  $\text{CDCl}_3$ )  $\delta$  7.33 (s, 1H), 5.60 (s, 1H), 4.63 (d,  $J = 5.2$  Hz, 2H), 4.42 (m, 1H), 3.96 (m, 1H), 3.90 (m, 1H), 3.32-2.93 (m, 8H), 2.46 (t,  $J = 7.6$  Hz, 2H), 2.17 (s, 3H), 2.10 (m, 2H), 1.86-1.54 (m, 9H), 1.50-1.20 (m, 25H), 1.03 (m, 1H).  $^{13}\text{C}$  NMR (75 MHz,  $\text{CDCl}_3$ )  $\delta$  165.9, 162.6, 162.2, 161.7, 155.6, 155.5, 155.5 (q,  $J = 35.5$  Hz), 140.4, 134.1, 116.6 (q,  $J = 286.3$  Hz), 94.6, 79.4, 79.2, 56.7 (0.34C), 55.0 (0.66C), 47.2, 46.5, 44.7, 44.1, 42.6, 40.9, 39.2, 32.6, 31.7, 31.4, 29.8, 28.6, 28.5, 26.9, 26.1, 25.6, 23.8, 23.8. ESMS  $m/z$ : 781.4 (M+1).

**[3-(*tert*-Butoxycarbonyl-cyclohexyl-amino)-propyl]-[3-(2-[4-methyl-6-(piperidin-4-ylamino)-pyrimidin-2-ylamino]-methyl)-oxazol-4-yl]-propyl}-carbamic acid *tert*-butyl ester (3).** To a magnetically stirred solution of **2** (1.80 g, 2.3 mmol) in MeOH/THF (18 mL/18 mL) under an atmosphere of nitrogen was added a solution of KOH (0.36 g, 6.4 mmol) in  $\text{H}_2\text{O}$  (3.6 mL). The mixture was stirred at 25 °C for 16 h and then concentrated. The residue was extracted with  $\text{CH}_2\text{Cl}_2$ , and combined organic extracts were washed with brine,

dried over Na<sub>2</sub>SO<sub>4</sub>, filtered, and concentrated to give crude **3** (1.47 g, 92%, purity > 96%). <sup>1</sup>H NMR (300 MHz, CDCl<sub>3</sub>) δ 7.32 (s, 1H), 5.60 (s, 1H), 5.41 (br s, NH), 4.63 (m, 2 H), 4.60 (br s, NH), 3.88 (m, 1H), 3.24-2.93 (m, 8H), 2.72 (m, 2H), 2.46 (t, *J* = 7.5 Hz, 2H), 2.17 (s, 3H), 2.02 (m, 2H), 1.86-1.54 (m, 9H), 1.44-1.20 (m, 25H), 1.03 (m, 1H). <sup>13</sup>C NMR (75 MHz, CDCl<sub>3</sub>) δ 165.9, 162.8, 162.3, 161.7, 155.7, 155.6, 140.4, 134.1, 94.1, 79.5, 79.3, 56.8 (0.34C), 55.1 (0.66C), 48.1, 46.6, 45.4, 44.2, 40.9, 39.2, 33.3, 31.5, 29.9, 28.7, 28.6, 27.0, 26.2, 25.7, 24.0, 23.8. ESMS *m/z*: 685.4 (M+1).

**(*tert*-Butoxycarbonyl-{3-[4-(2-{[4-(3-{*tert*-butoxycarbonyl-[3-(*tert*-butoxycarbonyl-cyclohexyl-amino)-propyl]-amino}-propyl)-oxazol-2-ylmethyl]-amino}-6-methyl-pyrimidin-4-ylamino)-piperidin-1-yl]-3-oxo-propyl}-amino)-acetic acid ethyl ester (4).**

To a magnetically stirred solution of crude **3** (1.41 g, 2.1 mmol,) in dichloromethane (70 mL) under an atmosphere of nitrogen were added EDCI (0.79 g, 4.1 mmol), HOBt (0.47 g, 3.1 mmol) and 3-((*tert*-butoxycarbonyl)(2-ethoxy-2-oxoethyl)amino)propionic acid (0.79 g, 2.9 mmol) sequentially in one portion. The reaction mixture was stirred at 25 °C for 16 h and then quenched with sat. NaHCO<sub>3(aq)</sub>. The organic solution was separated and washed with brine, dried over anhydrous sodium sulfate, filtered, and concentrated. The crude residue thus obtained was purified by flash chromatography on silica gel with MeOH/ethyl acetate (7:93) to give **4** (1.38 g, 71%). <sup>1</sup>H NMR (300 MHz, CDCl<sub>3</sub>) δ 7.33 (s, 1H), 5.59 (s, 1H), 5.43 (br s, NH), 4.63 (d, *J* = 5.1 Hz, 2H), 4.56 (br s, NH), 4.41 (m, 1H), 4.17 (q, *J* = 7.2 Hz, 2H), 4.01 (m, 2H), 3.89-3.86 (m, 2H), 3.58 (m, 2H), 3.26-2.96 (m, 7H), 2.79 (m, 1H), 2.67 (t, *J* = 6.6 Hz, 2H), 2.46 (t, *J* = 7.5 Hz, 2H), 2.17 (s, 3H), 2.08-1.90 (m, 4H), 1.86-1.54 (m, 7H), 1.50-1.20 (m, 37H), 1.03 (m, 1H). <sup>13</sup>C NMR (75 MHz, CDCl<sub>3</sub>) δ 170.6 (0.66C, C=O), 170.4 (0.34C, C=O), 169.9 (0.66C, C=O), 169.6 (0.34C, C=O), 165.9, 162.7, 162.2, 161.7, 155.7 (0.34C, C=O), 155.6, 155.5, 155.4 (0.66C, C=O), 140.4, 134.1, 94.3, 80.5 (0.34C), 80.3 (0.66C), 79.4, 79.2, 61.0 (0.34C), 60.9 (0.66C), 56.7 (0.34C) 55.0 (0.66C), 51.2 (0.66C), 50.4 (0.34C), 47.8, 46.5, 45.6, 44.9, 44.4, 40.7, 40.7, 39.1, 32.7, 32.6, 31.9, 31.4, 29.8, 28.6, 28.5, 28.3, 26.9, 26.1, 25.6, 23.9, 23.7, 14.4. ESMS *m/z*: 942.5 (M+1).

**(*tert*-Butoxycarbonyl-{3-[4-(2-{[4-(3-{*tert*-butoxycarbonyl-[3-(*tert*-butoxycarbonyl-cyclohexyl-amino)-propyl]-amino}-propyl)-oxazol-2-ylmethyl]-amino}-6-methyl-pyrimidin-4-ylamino)-piperidin-1-yl]-3-oxo-propyl}-amino)-acetic acid (5).** To a magnetically stirred solution of **4** (1.02 g, 1.1 mmol) in THF (10 mL) under an atmosphere of nitrogen was added an aqueous solution of LiOH<sub>(aq)</sub> (5 mL, 1 N). The mixture was stirred at 25 °C for 16 h and then quenched with sat. NH<sub>4</sub>Cl<sub>(aq)</sub>. The resulting mixture was extracted with ethyl acetate, and combined organic extracts were washed with brine, dried over

anhydrous sodium sulfate, filtered, and concentrated to give crude **5** (0.98 g, 99%, purity > 97%). <sup>1</sup>H NMR (300 MHz, CD<sub>3</sub>OD) δ 7.63 (s, 1H), 5.75 (s, 1H), 4.60 (s, 2H), 4.40 (m, 1H), 4.01-3.90 (m, 2H), 3.81 (m, 2H), 3.56 (m, 2H), 3.28-3.02 (m, 7H), 2.81 (m, 1H), 2.68 (m, 2H), 2.48 (t, *J* = 7.5 Hz, 2H), 2.16 (s, 3H), 2.00-1.60 (m, 11H), 1.53-1.20 (m, 34H), 1.03 (m, 1H). <sup>13</sup>C NMR (75 MHz, CDCl<sub>3</sub>) δ 175.5, 174.7 (0.34C, C=O), 174.5 (0.66C, C=O), 170.3 (0.66C, C=O), 170.0 (0.34C, C=O), 162.4, 160.7, 155.7 (0.34C, C=O), 155.6, 155.5 (0.66C, C=O), 155.4, 152.4, 140.5, 134.4, 96.5, 80.2 (0.34C), 80.1 (0.66C), 79.5, 79.3, 56.1 (0.34C), 55.0 (0.66C), 51.4 (0.66C), 51.0 (0.34C), 48.3, 46.5, 45.1, 44.8, 44.4, 40.7, 40.6, 38.4, 32.3, 31.4, 31.4, 30.7, 29.7, 28.6, 28.5, 28.3, 26.8, 26.0, 25.6, 23.6, 21.7. ESMS *m/z*: 914.5 (M+1). **(3-{4-[2-({4-[3-(3-Cyclohexylamino-propylamino)-propyl]-furan-2-ylmethyl}-amino)-6-methyl-pyrimidin-4-ylamino]-piperidin-1-yl}-3-oxo-propylamino)-acetic acid hydrochloride salt (BPRCX807)**. To a magnetically stirred solution of **5** (0.96 g, 1.05 mmol) in dichloromethane (30 mL) was added 2 *N* HCl/diethyl ether (15 mL). The mixture was stirred at 25 °C for 16 h followed by filtration and concentration under reduced pressure to afford **BPRCX807** as a hydrochloride salt (4 x HCl, 0.76 g, 95%). <sup>1</sup>H NMR (400 MHz, D<sub>2</sub>O) δ 7.69 (s, 1H), 5.90 (s, 1H), 4.73 (d, *J* = 17.2 Hz, 1H), 4.65 (d, *J* = 17.2 Hz, 1H), 4.25 (m, 1H), 3.99 (m, 1H), 3.93 (s, 2H), 3.85 (m, 1H), 3.40 (t, *J* = 6.4 Hz, 2H), 3.21 (m, 1H), 3.18-3.04 (m, 6H), 2.96 (t, *J* = 6.4 Hz, 2H), 2.84 (m, 1H), 2.61 (t, *J* = 7.6 Hz, 2H), 2.25 (s, 3H), 2.11-1.63 (m, 11H), 1.53-1.23 (m, 7H), 1.17 (m, 1H). <sup>13</sup>C NMR (100 MHz, D<sub>2</sub>O) δ 169.6, 168.8, 162.9, 162.2, 153.9, 152.1, 137.1, 136.3, 97.0, 57.4, 47.7, 47.5, 46.9, 44.5, 44.2, 43.9, 41.2, 40.7, 38.3, 30.3, 29.8, 28.8, 28.6, 24.4, 24.3, 23.8, 22.8, 21.5, 17.7. ESMS *m/z*: 614.4 (M+1). purity = 98.09%, *t<sub>R</sub>* = 9.17 min, The purity of BPRCX807 was determined by an Agilent 1100 series HPLC system using a C18 column (Thermo Golden, 4.6 mm × 250 mm) and the gradient system for HPLC separation was detailed in general analytical methods.

### Synthetic procedures and spectral characterization of intermediates and Linker 1

The major difference between compounds BPRCX714 and BPRCX807 lies in how to construct the five-membered ring of Linker 1, of which the former is mainly achieved by the use of click chemistry<sup>[1]</sup> and the latter is synthesized by an innovative and practical sequence as outlined in Scheme S1. L-serine methyl ester hydrochloride was first coupled with dichloroacetonitrile to give chloride **L1-1** over two steps in quantitative yield (98%),<sup>[2]</sup> which was substituted with sodium azide to afford the corresponding azide **L1-2** in 83% yield. **L1-2** was further reduced with PPh<sub>3</sub> to yield the corresponding primary amine, which without purification was coupled with benzyl chloroformate to form Cbz-protected **L1-3** in 65% yield

over two steps. The ester functionality of intermediate **L1-3** was reduced smoothly with  $\text{NaBH}_4/\text{CaCl}_2$  to afford the corresponding primary alcohol, which was subsequently oxidized with  $\text{MnO}_2$  to produce aldehyde **L1-4** in 59% yield over two steps. Intermediate **L1-4** was subjected to Wittig reaction followed by acidic hydrolysis with 2 *N*  $\text{HCl}_{(\text{aq})}$  to furnish **L1-5** in 89% yield over two steps. Reductive amination of **L1-5** was carried out to give the corresponding amine, which was protected with  $\text{Boc}_2\text{O}$  in excess to give *N*-Boc-protected **L1-6** in 72% yield over two steps. Finally, the Cbz protecting group could be selectively removed through hydrogenolysis under standard conditions to accomplish the desired Linker **1** in 89% yield.

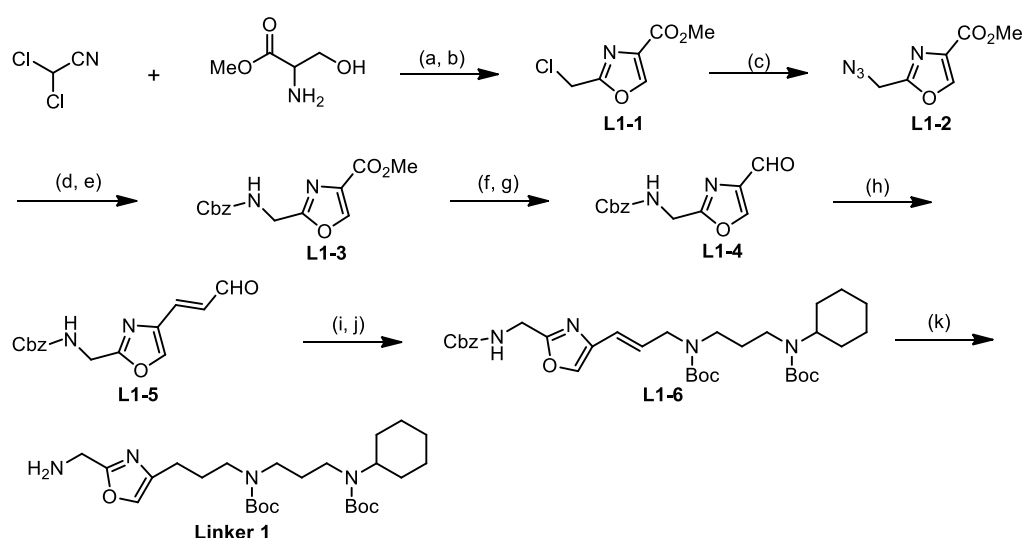

**Scheme S1.** The synthesis of Linker 1. (a)  $\text{MeONa}$ ,  $\text{CH}_2\text{Cl}_2/\text{MeOH}$ ,  $0\text{ }^\circ\text{C}$ , 1 h, rt, 15 h; (b) DIPEA,  $\text{CH}_2\text{Cl}_2$ ,  $50\text{ }^\circ\text{C}$ , 15 h, 98% over two steps; (c)  $\text{NaN}_3$ , DMF, rt, 15 h, 83%; (d)  $\text{PPh}_3$ , THF/ $\text{H}_2\text{O}$ , rt, 15 h; (e)  $\text{CbzCl}$ ,  $\text{NaHCO}_3$ , THF/ $\text{H}_2\text{O}$ , rt, 15 h, 65% over two steps; (f)  $\text{NaBH}_4$ ,  $\text{CaCl}_2$ , EtOH/THF, 0 to  $30\text{ }^\circ\text{C}$ , 2 h; (g)  $\text{MnO}_2$ ,  $\text{CH}_2\text{Cl}_2$ , rt, 2 h, 59% over two steps; (h) (1,3-dioxolan-2-ylmethyl)triphenylphosphonium bromide, *t*-BuOK, THF,  $5\text{ }^\circ\text{C}$ , 2 h then 2*N*  $\text{HCl}$  (aq.),  $10\text{ }^\circ\text{C}$ , 2 h, 89%; (i) *N*-(3-aminopropyl)cyclohexylamine,  $\text{CH}_2\text{Cl}_2$ , rt, 15 h then  $\text{NaBH}_4$ , MeOH,  $10\text{ }^\circ\text{C}$ , 1 h; (j)  $\text{Boc}_2\text{O}$ , TEA,  $\text{CH}_2\text{Cl}_2$ , rt, 3 h, 72% over two steps; (k) 10 % Pd/C,  $\text{H}_2$ , 2-propanol,  $50\text{ }^\circ\text{C}$ , 15 h, 89%.

**2-Chloromethyl-oxazole-4-carboxylic acid methyl ester (L1-1).** To a magnetically stirred solution of sodium methoxide (0.1 mL, 5.4 M in MeOH) in  $\text{CH}_2\text{Cl}_2$  (100 mL) and MeOH (10 mL) at  $0\text{ }^\circ\text{C}$  was added dichloroacetonitrile (5.02 g, 45.7 mmol) over 45 min. After the solution mixture was stirred at  $0\text{ }^\circ\text{C}$  for 1 h, L-serine methyl ester hydrochloride (7.91 g, 50.8 mmol) was then added. The reaction mixture was stirred at  $25\text{ }^\circ\text{C}$  for 15 h and then quenched with water. The resulting solution was concentrated, and the residue was extracted with dichloromethane (3 x 150 mL). The combined extracts were washed with water and brine, dried over anhydrous sodium sulfate, filtered, and concentrated to give a crude residue. A

mixture of residue and DIPEA (8.91 g, 68.9 mmol) in CH<sub>2</sub>Cl<sub>2</sub> (150 mL) was stirred at 50 °C for 15 h and then quenched with sat. NH<sub>4</sub>Cl<sub>(aq)</sub>. The aqueous phase was separated and extracted with CH<sub>2</sub>Cl<sub>2</sub> (2 x 50 mL). The combined organic extracts were washed with water, brine, dried over anhydrous sodium sulfate filtered, and concentrated. The residue was purified by flash column chromatography on silica gel with *n*-hexane/ethyl acetate (4:1) to afford **L1-1** (7.85 g, 98%). mp 95.3-95.8 °C. <sup>1</sup>H NMR (300 MHz, CDCl<sub>3</sub>) δ 8.25 (s, 1H), 4.64 (s, 2H), 3.93 (s, 3H). <sup>13</sup>C NMR (75 MHz, CDCl<sub>3</sub>) δ 161.2, 160.0, 145.2, 133.9, 52.5, 35.4. ESMS *m/z*: 176.0 (M+1).

**2-Azidomethyl-oxazole-4-carboxylic acid methyl ester (L1-2).** A mixture of the **L1-1** (8.01 g, 45.6 mmol) and sodium azide (10.02 g, 153.8 mmol) in DMF (240 mL) was stirred at 25 °C for 15 h and then quenched with sat. NH<sub>4</sub>Cl<sub>(aq)</sub>. The resulting solution was extracted with Et<sub>2</sub>O, and the combined extracts were washed with water and brine, dried over anhydrous sodium sulfate, filtered, and concentrated. The residue was purified by flash column chromatography on silica gel with *n*-hexane/ethyl acetate (4:1) to afford **L1-2** (6.91 g, 83%). mp 183.0-183.5 °C. <sup>1</sup>H NMR (400 MHz, CDCl<sub>3</sub>) δ 8.25 (s, 1H), 4.46 (s, 2H), 3.90 (s, 3H). <sup>13</sup>C NMR (100 MHz, CDCl<sub>3</sub>) δ 161.3, 159.7, 145.1, 133.8, 52.5, 46.6. ESMS *m/z*: 183.0 (M+1).

**2-(Benzyloxycarbonylamino-methyl)-oxazole-4-carboxylic acid methyl ester (L1-3).** A mixture of **L1-2** (6.91 g, 37.9 mmol) and triphenylphosphine (10.42 g, 39.7 mmol), in water (105 mL) /THF (210 mL) was stirred at 25 °C for 15 h. The resulting mixture was concentrated under reduced pressure to remove THF, and the residue was washed with ethyl acetate. To a mixture of amino product in the aqueous phase at 5-10 °C was added NaHCO<sub>3</sub> (6.37g, 75.8 mmol), THF (105 mL), and benzyl chloroformate (5.81 g, 34.0 mmol). The mixture was stirred at room temperature for 15 h and then quenched with aqueous NH<sub>4</sub>Cl<sub>(aq)</sub>. The resulting mixture was extracted with ethyl acetate, and the combined extracts were washed with water and brine, dried over anhydrous sodium sulfate, filtered, and concentrated. The residue was purified by flash column chromatography over silica gel with *n*-hexane/ethyl acetate (3:1) to afford **L1-3** (7.13 g, 65% over 2 steps). mp 75.7-76.2 °C. <sup>1</sup>H NMR (400 MHz, CDCl<sub>3</sub>) δ 8.17 (s, 1H), 7.35-7.28 (m, 5H), 5.69 (br s, NH), 5.11 (s, 2H), 4.53 (d, *J* = 6.0 Hz, 2H), 3.88 (s, 3H). <sup>13</sup>C NMR (100 MHz, CDCl<sub>3</sub>) δ 162.1, 161.5, 156.4, 144.5, 136.2, 133.4, 128.7, 128.4, 128.3, 67.5, 52.4, 38.4. ESMS *m/z*: 291.0 (M+1).

**(4-Formyl-oxazol-2-ylmethyl)-carbamic acid benzyl ester (L1-4).** To a solution of **L1-3** (10.02 g, 34.5 mmol) in EtOH (200 mL) and THF (100 mL) at 0-5 °C was added CaCl<sub>2</sub> (4.01 g, 36.1 mmol) and NaBH<sub>4</sub> (7.01 g, 185.3 mmol) in one portion. The resulting solution was

then stirred at 30 °C for 2 h and quenched with sat.  $\text{NH}_4\text{Cl}_{(\text{aq})}$ . The solution mixture was extracted with DCM (3 x 150 mL). The combined organic extracts were washed with brine, dried over anhydrous sodium sulfate and filtered.  $\text{MnO}_2$  (36.31 g, 417.8 mmol) was added to the filtrate and stirred at 25 °C for 2 h. The mixture was then filtered and concentrated to afford crude **L1-4**, which was subjected to chromatography purification to give **L1-4** (5.31 g, 59% over two steps). mp 78.7-79.2 °C.  $^1\text{H}$  NMR (400 MHz,  $\text{CDCl}_3$ )  $\delta$  9.87 (s, 1H), 8.21 (s, 1H), 7.40-7.33 (m, 5H), 5.75 (br s, NH), 5.13 (s, 2H), 4.55 (d,  $J$  = 6.0 Hz, 2H).  $^{13}\text{C}$  NMR (75 MHz,  $\text{CDCl}_3$ )  $\delta$  183.8, 162.8, 156.5, 145.3, 140.9, 136.1, 128.7, 128.5, 128.3, 67.5, 38.4. ESMS  $m/z$ : 261.0 (M+1).

**[4-(3-Oxo-propenyl)-oxazol-2-ylmethyl]-carbamic acid benzyl ester (L1-5)**. A solution of **L1-4** (3.63 g, 13.9 mmol), (1,3-Dioxolan-2-ylmethyl) triphenylphosphonium bromide (7.21 g, 16.8 mmol), and *t*-BuOK (1.92 g, 17.1 mmol) in THF (100 mL) was stirred at 5 °C for 2 h. To the resulting mixture was added  $\text{HCl}_{(\text{aq})}$  (50 mL, 2 N) and stirred at 10-15 °C for 2 h and then quenched with sat.  $\text{NaHCO}_3_{(\text{aq})}$ . The mixture was extracted with ethyl acetate, and the combined organic extracts were washed with brine, dried over anhydrous sodium sulfate, filtered, and concentrated. The residue was purified by flash column chromatography on silica gel with *n*-hexane/ethyl acetate (3:1) to afford product **L1-5** (3.54 g, 89%). mp 110.2-110.7 °C.  $^1\text{H}$  NMR (400 MHz,  $\text{CDCl}_3$ )  $\delta$  9.66 (d,  $J$  = 8.0 Hz, 1H), 7.85 (s, 1H), 7.40-7.33 (m, 5H), 7.27 (d,  $J$  = 15.6 Hz, 1H), 6.82 (dd,  $J$  = 15.6, 8.0 Hz, 1H), 5.49 (br s, NH), 5.15 (s, 1H), 4.54 (d,  $J$  = 5.6 Hz, 1H).  $^{13}\text{C}$  NMR (100 MHz,  $\text{CDCl}_3$ )  $\delta$  193.2, 162.4, 156.4, 140.4, 139.2, 137.5, 136.2, 130.5, 128.8, 128.5, 128.4, 67.6, 38.6. ESMS  $m/z$ : 287.1 (M+1).

**{3-[2-(Benzyloxycarbonylamino-methyl)-oxazol-4-yl]-allyl}-{3-(tert-butoxycarbonyl-cyclohexyl-amino)-propyl}-carbamic acid tert-butyl ester (L1-6)**. To a magnetically stirred solution of **L1-5** (6.55 g, 22.9 mmol) in dry  $\text{CH}_2\text{Cl}_2$  (110 mL) were added *N*-cyclohexyl-1,3-propanediamine (4.11 g, 26.3 mmol) and  $\text{MgSO}_4$  (10.51 g) in one portion. The mixture was stirred at 25 °C for 15 h and then filtered. The filtrate was added into the solution of  $\text{NaBH}_4$  (1.38 g, 36.5 mmol) in MeOH (240 mL) slowly. The mixture was stirred at 10 °C for 1 h and then concentrated. The residue was dissolved in  $\text{CH}_2\text{Cl}_2$  (150 mL), and the organic solution was washed with  $\text{NH}_4\text{Cl}$ , brine, dried over anhydrous sodium sulfate, and filtered.  $\text{Boc}_2\text{O}$  (11.51 g, 52.7 mmol) and TEA (5.35 g, 53.0 mmol) were added sequentially in one portion to the filtrate. The mixture was stirred at room temperature for 3 h and then concentrated. The residue was purified by flash column chromatography on silica gel with *n*-hexane/ethyl acetate (1:1) to afford **L1-6** (10.35 g, 72% over 2 steps).  $^1\text{H}$  NMR (300 MHz,  $\text{CDCl}_3$ )  $\delta$  7.47 (s, 1H), 7.36-7.31 (m, 5H), 6.36-6.22 (m, 2H), 5.42 (br s, NH),

5.14 (s, 2H), 4.49 (d,  $J$  = 5.7 Hz, 2H), 3.94 (m, 2H), 3.22-2.98 (m, 4H), 1.80-1.56 (m, 7H), 1.45 (s, 9H), 1.43 (s, 9H), 1.41-1.20 (m, 5H), 1.03 (m, 1H).  $^{13}\text{C}$  NMR (75 MHz,  $\text{CDCl}_3$ )  $\delta$  161.0, 156.4, 155.6, 155.6, 138.6, 136.3, 135.3, 128.7, 128.4, 128.3, 119.9, 119.2, 79.8, 79.3, 67.4, 56.7 (0.34C), 55.1 (0.66C), 48.5, 44.7, 40.9, 38.6, 31.4, 29.8, 28.7, 28.6, 26.2, 25.7. ESMS  $m/z$ : 627.4 (M+1).

**[3-(2-Aminomethyl-oxazol-4-yl)-propyl]-[3-(tert-butoxycarbonyl-cyclohexyl-amino)-propyl]-carbamic acid tert-butyl ester (Linker 1).** A mixture of **L1-6** (10.35 g, 16.5 mmol) and 10% Pd/C (4.66 g) in *iso*-propanol (310 mL) was stirred under  $\text{H}_{2(g)}$  at 50 °C for 15 h. The resulting mixture was filtered, and the filtrate was concentrated to afford Linker 1 (7.23 g, 89 %).  $^1\text{H}$  NMR (300 MHz,  $\text{CDCl}_3$ )  $\delta$  7.31 (s, 1H), 3.90 (s, 2H), 3.23-2.92 (m, 6H), 2.43 (t,  $J$  = 7.2 Hz, 2H), 1.81-1.50 (m, 9H), 1.41 (s, 18H), 1.40-1.18 (m, 5H), 1.02 (m, 1H).  $^{13}\text{C}$  NMR (75 MHz,  $\text{CDCl}_3$ )  $\delta$  164.1, 155.6, 155.6, 140.3, 134.3, 79.4, 79.3, 56.6 (0.34C), 55.1 (0.66C), 46.5, 44.8, 40.9, 39.3, 31.4, 29.7, 28.7, 28.6, 26.9, 26.1, 25.7, 23.7. ESMS  $m/z$ : 495.3 (M+1).

### Wound healing and invasion assays

Cell migration ability was measured by wound healing assay. HCA-1 cells ( $5 \times 10^5$  cells per well) were seeded onto 12-well plates and incubated overnight. When the cell confluence exceeded 90%, scratch wounds were made by scraping a straight line in the middle of the cell layer using the tip of a 1000  $\mu\text{L}$  pipette. After washing the cells with PBS, the cells were incubated in serum-free medium under different treatment conditions (control, 100 ng/mL CXCL12, and 10  $\mu\text{M}$  BPRCX807 with 100 ng/mL CXCL12). Then, 3-4 fields (40 $\times$ ) of each group were randomly chosen and observed by a microscope (IX83, Olympus, Japan) at time points of 0 h, 24h, 48 h and 72 h. For the invasion assay, HCA-1 cells were suspended in RPMI 1640 containing 0.5% FBS and then preincubated with the indicated concentrations of compounds for 10 min at 37 °C. The assay was performed in Millicell Hanging Cell Culture Inserts (pore size 8  $\mu\text{m}$ ; 24-well plate; Millipore, Bedford, MA). A mixture of BPRCX807 and 10 nM CXCL12 was added to the lower chambers of the inserts, and cells with compounds were plated in the upper chambers of the inserts at a density of  $2.5 \times 10^5$  cells/well. After 17.5 h of incubation at 37 °C, the cells in both chambers of the inserts were measured with a CellTiter-Glo Luminescent Cell Viability Assay (Promega, Wisconsin).

### Human CXCR4-binding assay

Aliquots of 2.5  $\mu\text{g}$  of purified HEK293T cell membrane fractions with CXCR4 were incubated with 0.16 nM [ $^{125}\text{I}$ ]CXCL12 (PerkinElmer, Boston, MA) and the indicated

concentrations of BPRCX807 in incubation buffer (50 mM HEPES-NaOH, pH 7.4, 100 mM NaCl, 5 mM MgCl<sub>2</sub>, 1 mM CaCl<sub>2</sub>, 0.5% BSA). Nonspecific binding was defined in the presence of 50  $\mu$ M AMD3100 (plerixafor). The reaction mixtures were incubated for 1.5 h at 30 °C and then transferred to a 96-well GF/B filter plate (Merck Millipore, Billerica, MA). The reaction mixtures were terminated by manifold filtration and washed with ice-cold wash buffer (50 mM HEPES-NaOH, pH 7.4, 100 mM NaCl) four times. The radioactivity bound to the filter was measured with a TopCount instrument (PerkinElmer, Waltham, MA). The IC<sub>50</sub> values were determined as the concentrations of the compounds required to inhibit 50% of the specific binding of [<sup>125</sup>I]CXCL12 and were calculated by nonlinear regression (GraphPad software, San Diego, CA).

### **Pharmacokinetics and toxicological studies**

Male C57BL/6 mice, each weighing 23.4–25.4 g, were quarantined for 1 week before drug treatment. Compounds dissolved in 100% saline were individually given to mice (n = 3) subcutaneously (6 mg/kg; nonfasted mice). Blood samples were collected via cardiac puncture at defined time points (0 (immediately before dosing), 0.03, 0.08, 0.25, 0.5, 1, 2, and 4 h after dosing) and then stored at –80 °C. The volume of the dosing solution given was 100  $\mu$ L for each mouse. The plasma samples were analyzed by liquid chromatography–tandem mass spectrometry (LC–MS/MS), and the data were calculated by a standard noncompartmental method using the Kinetica software program (InnaPhase). ICR mice were subcutaneously treated with BPRCX807 (n = 3/group) from a low to a high dose to determine the maximum tolerated dose (MTD) based on zero mortality (n = 3, 0/3). Test animals following administration of the target compound at its highest dose remain alive and temporary adverse effects such as decreased movement/activity can be recovered within 2 h after dosing. In a non-GLP repeated dose toxicology study, BPRCX807 solved in saline was subcutaneously administered to SD rats at 50 mg/kg/day for 14 consecutive days. The organ and body weights of the rats were examined using an electronic balance. Blood samples were collected from all animals 28 h after the last injection for serum chemistry and hematology.

### **Cytochrome P450 testing**

The effects of BPRCX807 on the activity of six specific human liver cytochrome P450 isozymes (CYP 1A2, 2C9, 2C19, 2D6, 2E1, 3A4) expressed in baculovirus-infected insect cell supersomes were studied. The reactions used to measure the activity of these enzymes

were phenacetin O-deethylation (1A2), diclofenac 4-hydroxylation (2C9), mephenytoin 4-hydroxylation (2C19), dextromethorphan O-demethylation (2D6), chlorzoxazone 6-hydroxylation (2E1) and testosterone 6-hydroxylation (3A4). Furaflavone, sulfaphenazole, tranilcypropane, quinidine, diethyldithiocarbamate and azamulin were used as reference inhibitors of these enzymes. Incubation mixtures containing no BPRC807 or reference inhibitors were used as controls.

### ***In vivo* hepatocellular carcinoma treatment studies**

To establish murine or human HCC models, HCA-1 or JHH-7 cells were orthotopically implanted in the livers of 7-week-old C3H/HeN<sup>CrNarl</sup> and 9-week-old BALB/cAnN.Cg-*Foxnl<sup>nu</sup>*/CrINarl mice separately using 20 µl of Matrigel solution.<sup>[3]</sup> The groups of HCA-1 and JHH-7 tumor-bearing mice included a control group and groups gavaged with sorafenib at a dose of 40 mg/kg in 1% Tween 80 (5 doses/week) and with one of the CXCR4 inhibitors (AMD3100, BPRC714 and BPRC807) (15 mg/kg/day, subcutaneously by osmotic minipump; Sigma). For combined anti-PD-1 immunotherapy, ten days after tumor implantation, mice were injected intraperitoneally four times (at 3- to 4-d intervals) with anti-mouse PD-1 (200 µg/mouse; BioXcell, BE0146). The therapeutic efficacy and the changes in immune cells were analyzed after two weeks of treatment. The tumor volume was calculated with the following formula: volume = width × length × height/2. The lung metastatic nodules were counted with a dissection microscope (SMZ-1B, Nikon, Japan).

### ***In vivo* chemical-induced HCC mice models**

C3H mice were administered diethylnitrosamine (DEN; two IP injections of 1mg/kg at 4 and 5 weeks of age). Later, CCl<sub>4</sub> (100 µL of 16% (v/v) in olive oil, 3 times/week P.O. starting at 6 weeks of age) was administered for 24 weeks to develop chemical-induced, fibrosis-promoted HCC. Treatment of BPRC807 in minipumps (15 mg/kg/day, SC) and anti-mouse PD-1 (200 µg/mouse; IP; BioXcell, BE0146) was initiated after 22 weeks of CCl<sub>4</sub> administration, and spontaneous HCC formation was examined after 4 weeks of treatment.

### **Molecular docking protocol of ligand-CXCR4 receptor binding**

The protein structure of human CXCR4 (Protein Data Bank identifier (PDB ID): 4RWS) was applied for the docking strategy to illustrate the binding interaction with BPRC807, BPRC714 and AMD3100. Before docking calculation was carried out, the mutated residues

(L125W, D187C, and T240P) in the published X-ray PDB file were returned to their original residues. All docking calculations were performed by using the Discovery Studio 2018/LigandFit program (BIOVIA, Inc., San Diego, CA). Molecular dynamics (MD) simulations were carried out in GROMACS v5.1.2 software to refine the docked conformation.<sup>[4]</sup> After 20 ns simulations, the complex structure of BPRCX807, AMD3100 and BPRCX714 could attain stable and equilibrium states. The topology of each docked ligand was generated by the PRODRG server.<sup>[5]</sup> The force field for the whole system was the GROMOS 43a1 force field.<sup>[6]</sup> The protein-ligand complex was restrained in a cube whose edges were placed 1 nm from the complex, and the SPC/E water model was used. The system was electrically neutralized by adding 9 Cl<sup>-</sup> ions. Energy minimization was performed using the steepest descent and conjugate gradient methods to converge the system to 10 kJ/mol/nm. After a short energy minimization step, the system was subjected to NVT (300 K) and NPT (1 bar) equilibration with a 100 ps running time, and the LINCS algorithm was used to constrain the hydrogen bond lengths.<sup>[7]</sup> The time step was kept at 2 fs for the simulation. A cut-off distance of 10 Å was used for all short-range nonbonded interactions, and 12 Å Fourier grid spacing was used in the PME method for long-range electrostatics. Finally, the restraints were removed, and a 20 ns MD calculation was performed.

### **Hematoxylin and Eosin staining**

Lung tissue was cut into small pieces and fixed in 4% PFA (in PBS) overnight before being embedded in paraffin wax. The sections were then stained with hematoxylin and eosin (H&E) and observed with an inverted microscope (IX83, Olympus, Japan).

### **Flow cytometry analysis**

HCA-1 tumor-bearing mice were anesthetized, perfused via intracardiac injection with PBS and then sacrificed. Tumor tissues were collected and harvested in enzyme-containing DMEM cell culture medium (1.5 mg/mL of collagenase type 1A and hyaluronidase; Sigma). The tissues were cut and ground into smaller pieces and then digested for 1 h at 37 °C to form suspensions of single tumor cells. The suspensions were filtered through a 70-µm cell strainer (Corning, Manassas, VA), and the cells were then incubated with rat anti-mouse CD16/CD32 mAbs to block Fc receptors. After washing 3 times and resuspending in cold flow buffer (1% BSA, 0.1% NaN<sub>3</sub> in PBS), the single-cell suspensions were incubated with monoclonal anti-mouse F4/80-PE (eBiosciences, San Diego, CA), 7-AAD, CD3e-APC, CD8a-PE-Cy7, CD45-FITC, CD4-PE (BD Biosciences, East Rutherford, NJ), CD86-APC-

Cy7, and CD206-APC (BioLegend, San Diego, CA) antibodies, as previously described.<sup>[8]</sup> Flow cytometry data were acquired on a BD FACSAria III flow cytometer and analyzed with FACSDiva software.

C57BL/6 male mice were treated with potential CXCR4 antagonist individually by subcutaneous injection, and then blood samples containing mobilized stem/progenitor cells were collected 2 hours later. After labeled with specific antibodies, including APC-conjugated anti-CXCR4 (clone 2B11; eBioscience) and FITC-conjugated anti-CD34 (clone RAM34; eBioscience), cells were washed, characterized and quantified by flow cytometer (Guava Technologies, Hayward, CA, USA). Each data point included at least 60,000 events for analysis of other cell types.

### **Western blot analysis**

Western blotting was conducted by following standard procedures. HCA-1 or JHH-7 cells ( $10^5$  cells per well) were seeded in 12-well plates (Costar, IL), incubated for 12 h and treated with AMD3100, BPRCX714 or BPRCX807 at different concentrations in rCXCL12-containing (100 ng/mL) serum-free medium. After 24 h, the cells were lysed in RIPA buffer on ice for 30 min, and samples were collected and loaded with 4× Laemmli Sample buffer (Bio-Rad, Hercules, CA). The samples were separated on a 10% SDS-PAGE gels and transferred to PVDF membranes. After blocking with skim milk for 1 h, the membranes were incubated at 4°C overnight with primary antibodies against p-AKT, AKT, p-ERK, ERK (Cell Signaling, Danvers, MA) or  $\beta$ -actin (Sigma-Aldrich, St. Louis, MO) before incubation with HRP-conjugated secondary antibodies (Antibodies Inc., Davis, CA) for 1 h. Autoradiography was conducted after ECL reagent (Thermo Scientific, Rockford, IL) was added to the membranes.

### **Reverse transcription quantitative real time PCR**

Total RNA was extracted from HCA-1 cells using the RNeasy Mini Kit (Qiagen, CA, USA). cDNAs were synthesized using the High-Capacity cDNA Reverse Transcription Kit (Applied Biosystems, CA, USA). Primers specific for Slug, Fn1, Cdh2, Vim, Foxc2, Zeb1, Zeb2, Twist1, Cdh1, Mta3, Cldn3, Cldn5,  $\beta$ -actin and GAPDH were used, and relative gene expression was determined using Real-Time SYBR Green PCR Master Mix (Applied Biosystems, CA, USA) on a QPCR System. The comparative threshold cycle method was used to calculate fold change in gene expression, which was normalized to  $\beta$ -actin as a reference gene.

**Table: List of genes examined by real-time PCR and the primer sequences used.**

| Genes          | Forward primers                 | Reverse primers                 |
|----------------|---------------------------------|---------------------------------|
| Slug           | 5'- TGGTCAAGAAACATTTCAACGCC-3'  | 5'-GGTGAGGATCTCTGGTTTTGGTA -3'  |
| Fn1            | 5'-TGTGACCAGCAACACGGTG-3'       | 5'-ACAACAGGAGAGTAGGGCGC-3'      |
| Cdh2           | 5'-AGCGCAGTCTTACCGAAGG -3'      | 5'- TCGCTGCTTTCATACTGAACTTT -3' |
| Vim            | 5'-CTTGAACGGAAAGTGAATCCT-3'     | 5'-GTCAGGCTTGGAACGTCC-3'        |
| Foxc2          | 5'- AACCCAACAGCAAACCTTTCCC -3'  | 5'- GCGTAGCTCGATAGGGCAG -3'     |
| Zeb1           | 5'- ACTGCAAGAAACGGTTTTCCC -3'   | 5'- GGCGAGGAACACTGAGATGT -3'    |
| Zeb2           | 5'-ATTGCACATCAGACTTTGAGGAA-3'   | 5'-ATAATGGCCGTGTCGCTTCG-3'      |
| Twist1         | 5'-CTGCCCTCGGACAAGCTGAG-3'      | 5'-CTAGTGGGACGCGGACATGG-3'      |
| Cdh1           | 5'-CAGTCATAGGGAGCTGTCTACCAAA-3' | 5'-GGGTACACGCTGGGAAACAT-3'      |
| Mta3           | 5'-AAAAGCAGAAGCACCAGGAA-3'      | 5'-GGCCCATCTAGACCATTGTG-3'      |
| Cldn3          | 5'- CCAACTGCGTACAAGACGAG -3'    | 5'- CCAGGACACCGGTACTAAGG-3'     |
| Cldn5          | 5'- CTCTGCTGGTTCGCCAACA -3'     | 5'- CCCAGCTCGTACTTCTGTGACA -3'  |
| $\beta$ -actin | 5'-TGAGAGGGAAATCGTGCGTG-3'      | 5'-TTGCTGATCCACATCTGCTGG-3'     |
| GAPDH          | 5'-CTGCCACCCAGAAGACTGTG-3'      | 5'-GGTCCTCAGTGTAGCCCAAG-3'      |

**Off-target standard assays**

Methods employed in this study have been adapted from the scientific literature to maximize reliability and reproducibility. Reference standards were run as an integral part of each assay to ensure the validity of the results obtained. Radioligand binding Assays were performed under conditions described in the accompanying "Methods" section of this report by **Eurofins Panlabs, Inc** (Taipei, Taiwan, ROC).

***hERG* patch-clamp assay**

BPRCX807 were tested in the *hERG* (*hERG*-CHO, automated patch-clamp) assay and determined at Eurofins Panlabs (Missouri, USA). The experiment was accepted in accordance with **Eurofins** validation Standard Operating Procedure.

**Selectivity Screening of various chemokine receptors**

The results were performed by **Eurofins DiscoverX** (Fremont, California, USA). The

PathHunter®  $\beta$ -Arrestin assay was performed in a homogenous, non-imaging assay format using a technology developed by DiscoverX called Enzyme Fragment Complementation (EFC) with  $\beta$ -galactosidase ( $\beta$ -Gal) as the functional reporter. The enzyme is split into two inactive complementary portions: a small peptide, called ProLink™ (PK) and a larger protein, called Enzyme Acceptor (EA). PK and EA are then expressed as fusion proteins in the cell, with PK fused to the GPCR of interest, and EA fused to  $\beta$ -arrestin. When the receptor is activated and  $\beta$ -arrestin is recruited to the receptor, PK and EA complementation occurs, restoring  $\beta$ -Gal activity which is measured using chemiluminescent PathHunter® Detection Reagents. For antagonist determination, cells were pre-incubated with BPRCX807 followed by indicated chemokine challenge. Intermediate dilution of sample stocks was performed to generate 5 $\times$  sample in assay buffer. 5  $\mu$ L of 5 $\times$  sample was added to cells and incubated at 37 °C or room temperature for 30 minutes. Vehicle concentration was 1%. 5  $\mu$ L of indicated chemokine in assay buffer was added to the cells and incubated at 37 °C or room temperature for 90 minutes to detect the effect of BPRCX807 on indicated receptors.

## Statistics

All statistical analyses were performed with Graph Pad Prism software. According to the data distribution, the multiple *t*-test or the Mann-Whitney *U*-test was used. *p*-values smaller than 0.05 were considered to indicate statistical significance for all tests.

## References

- [1] C.-H. Wu, J.-S. Song, H.-H. Kuan, S.-H. Wu, M.-C. Chou, J.-J. Jan, L. K. Tsou, Y.-Y. Ke, C.-T. Chen, K.-C. Yeh, S.-Y. Wang, T.-K. Yeh, C.-T. Tseng, C.-L. Huang, M.-H. Wu, P.-C. Kuo, C.-J. Lee, K.-S. Shia, *J. Med. Chem.* **2018**, *61*, 818-833.
- [2] S. A. Hermitage, K. S. Cardwell, T. Chapman, J. W. B. Cooke, R. Newton, *Org Process Res Dev* **2001**, *5*, 37-44.
- [3] W. Kim, J. Seong, H. J. Oh, W. S. Koom, K.-J. Choi, C.-O. Yun, *J. Radiat. Res.* **2011**, *52*, 646-654.
- [4] H. J. C. Berendsen, D. van der Spoel, R. van Drunen, *Comput. Phys. Commun.* **1995**, *91*, 43-56.
- [5] A. W. Schuttelkopf, D. M. F. van Aalten, *Acta Crystallogr. D* **2004**, *60*, 1355-1363.
- [6] S.-W. Chiu, S. A. Pandit, H. L. Scott, E. Jakobsson, *J. Phys. Chem. B* **2009**, *113*, 2748-2763.
- [7] B. Hess, H. Bekker, H. J. C. Berendsen, J. G. E. M. Fraaije, *J. Comput. Chem.* **1997**, *18*, 1463-1472.
- [8] Y. Huang, J. Yuan, E. Righi, W. S. Kamoun, M. Ancukiewicz, J. Nezivar, M. Santosuosso, J. D. Martin, M. R. Martin, F. Vianello, P. Leblanc, L. L. Munn, P. Huang, D. G. Duda, D. Fukumura, R.K. Jain and M. C. Poznansky, *Proc. Natl. Acad. Sci. U.S.A.* **2012**, *109*, 17561-17566.

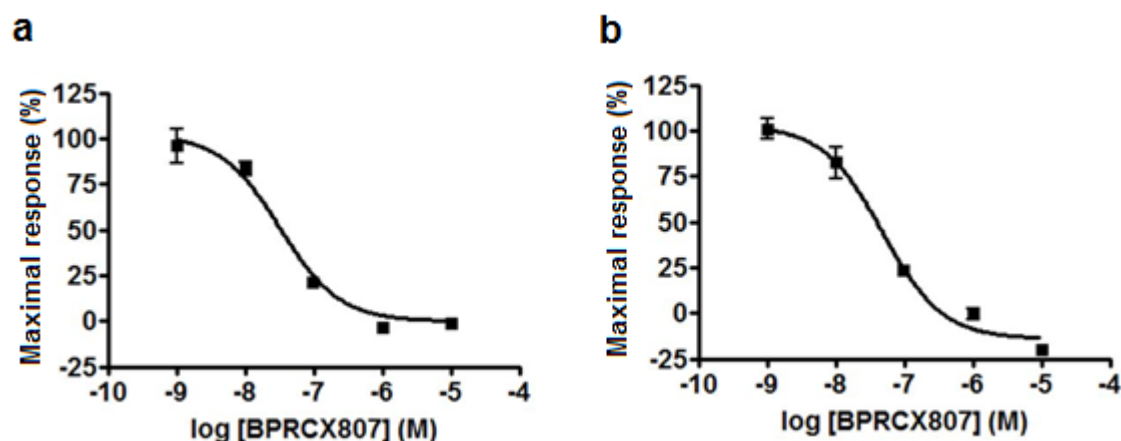

**Figure S1. Binding affinity and chemotaxis inhibition assay of BPRCX807.** (a) Binding affinity ( $IC_{50}$ ) of BPRCX807 was determined by 50% inhibition of radioligand [ $^{125}I$ ]CXCL12 binding to hCXCR4-transfected HEK293T membrane; (b) CXCL12-induced chemotaxis inhibition assay was performed to measure the inhibitory activity of BPRCX807 using CCRF-CEM cell line. Values represent the mean  $\pm$  SD of at least three independent experiments.

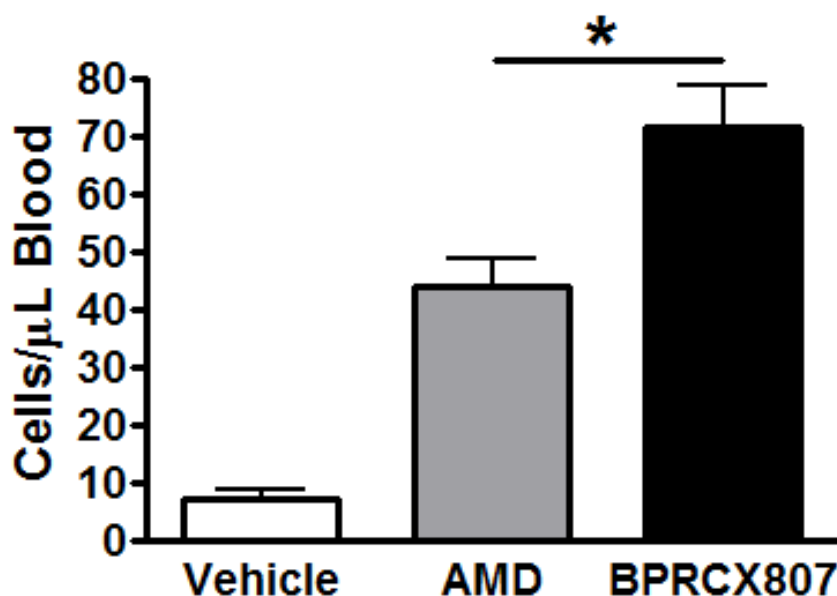

**Figure S2. CXCR4<sup>+</sup>CD34<sup>+</sup> stem cell mobilization.** C57BL/6 male mice were subcutaneously administered with vehicle, AMD3100 (6 mg/kg), or BPRCX807 (6 mg/kg) 2 h after dosing, the peripheral blood was harvested for analyzing the number of CXCR4<sup>+</sup>CD34<sup>+</sup> stem cells. The data are the mean values  $\pm$  SEM ( $n = 3/\text{group}$ ). Statistical analysis was performed by  $t$ -test:  $*p < 0.05$  between AMD3100 and BPRCX807.

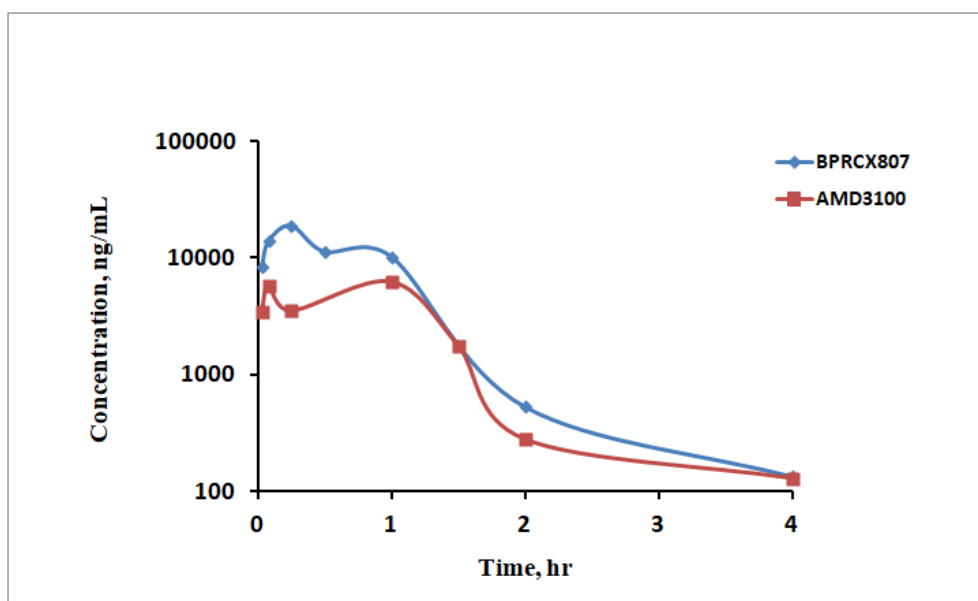

**Figure S3. The plasma concentration profile (AUC) of BPRCX807 and AMD3100.** Y-axis is on a log scale; pharmacokinetic analysis following SC (6 mg/kg) in C57BL/6 mice for each time point n = 3.

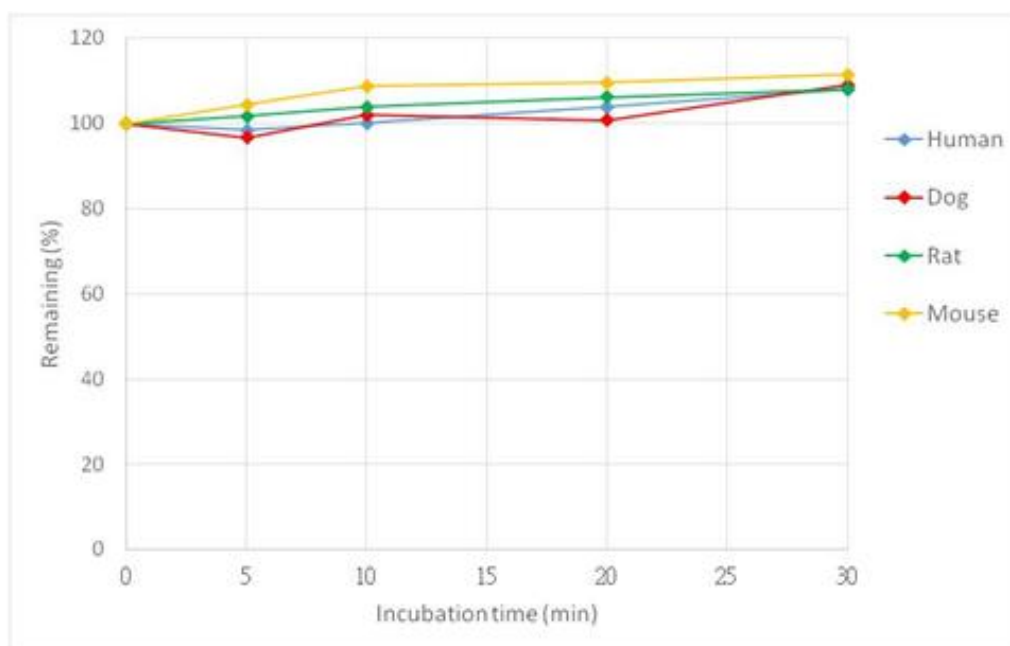

**Figure S4. The metabolic stabilities of BPRCX807 in liver microsomes.** BPRCX807 is metabolically stable in mouse, rat, dog and human.

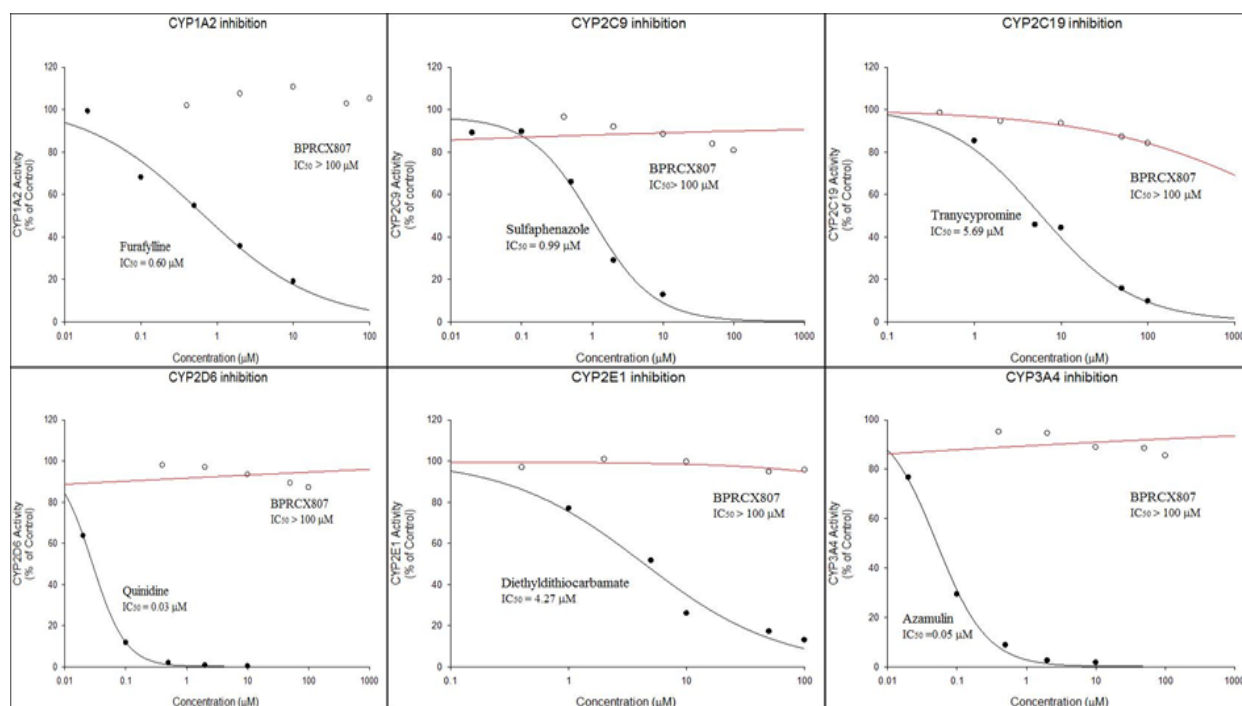

**Figure S5. Inhibitory values ( $IC_{50}$ ) of BPRCX807 on 6 human liver P450 isozymes.**

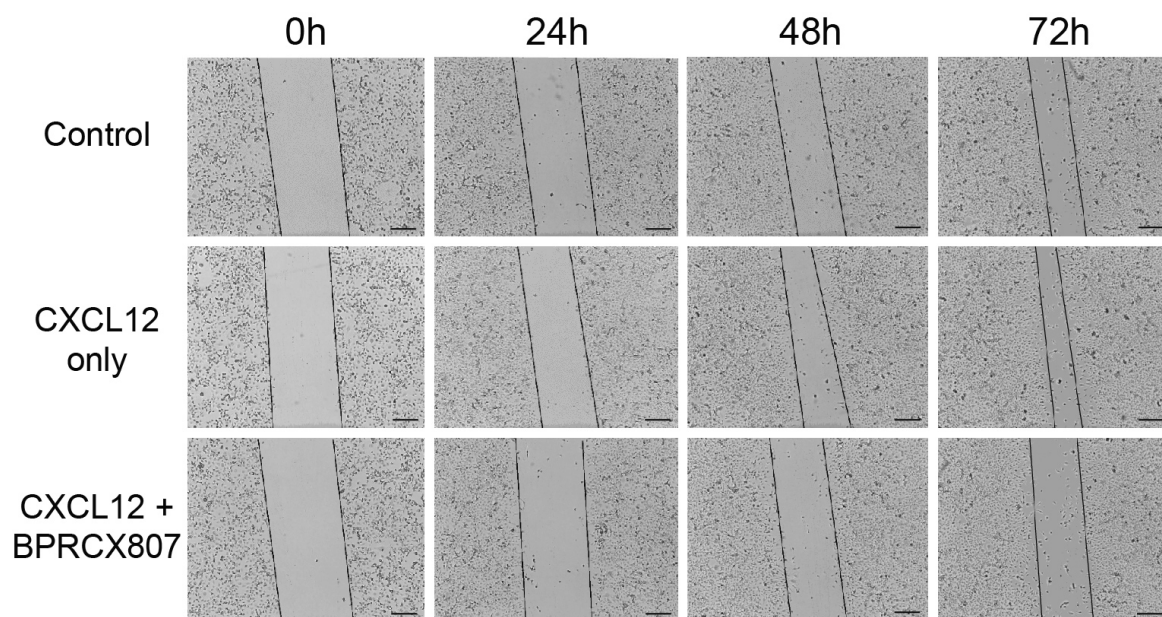

**Figure S6. BPRCX807 suppresses CXCL12/CXCR4 axis-mediated migration of HCC cells.** Representative images from wound healing migration assays using HCA-1 cells incubated for 24, 48, and 72 h after treatment with CXCL12 (100 ng/mL) and BPRCX807 (10  $\mu$ M). Scale bar = 200  $\mu$ m.

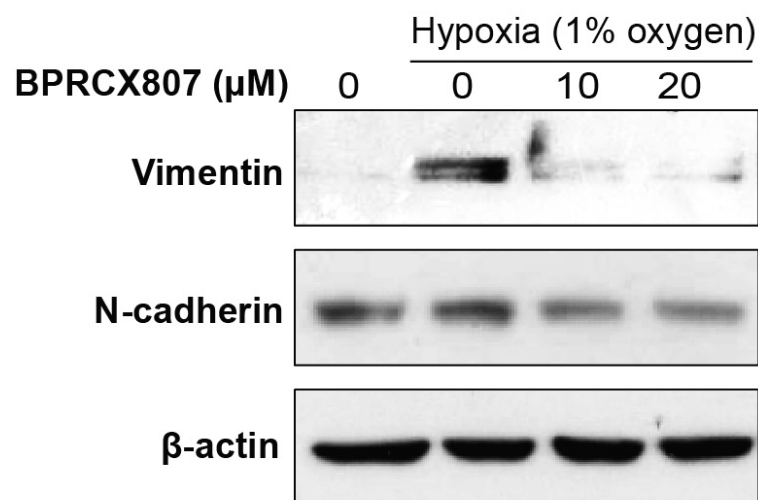

**Figure S7. BPRCX807 inhibits the EMT phenotype of HCA-1 cells under hypoxic conditions (1% oxygen).** The protein levels of mesenchymal markers (vimentin and N-cadherin) were determined by western blotting 48 h after treatment with **BPRCX807** at different doses.

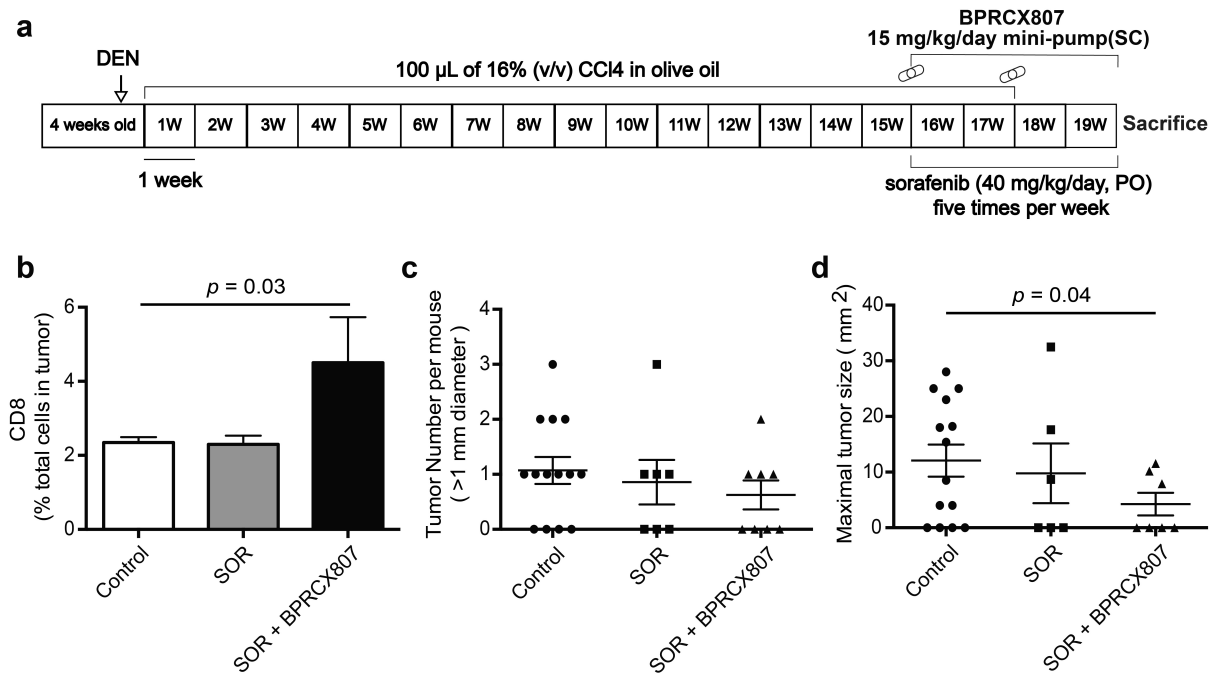

**Figure S8. DEN/CCl<sub>4</sub>-induced liver fibrosis associated HCC model.** (a) Experimental protocol. (b) Analysis of CD8<sup>+</sup> T cells (n = 4-6). (c) Liver tumor nodule counts (>1 mm) per mouse. (d) Measurement of tumor size. The data are the mean value  $\pm$  S.E.M..

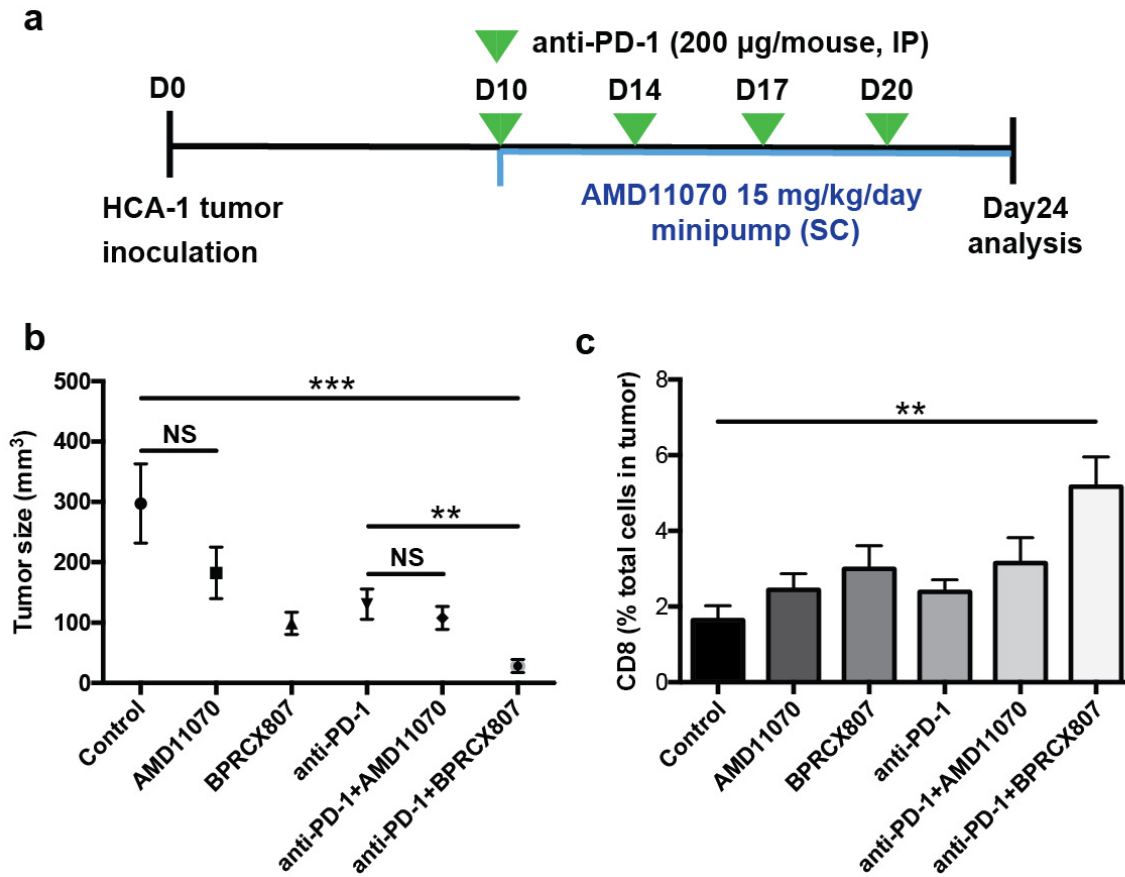

**Figure S9. Synergistic effects of AMD11070 with immune therapy in the orthotopic HCA-1 model.** (a) Treatment protocol. Ten days after implantation of HCC cells, mice were treated with **AMD11070** (15 mg/kg/day, SC) by minipump from day 10 to day 24. Anti-PD-1 Ab (200 µg/mouse) was injected IP on days 10, 14, 17, and 20 after tumor implantation. (b) Tumor sizes (n = 8-10). (c) T cells (n = 4-8) was shown in CD8<sup>+</sup> T cells. The data are the mean value ± S.E.M.. \*p < 0.05, \*\*p < 0.01, and \*\*\*p < 0.001.

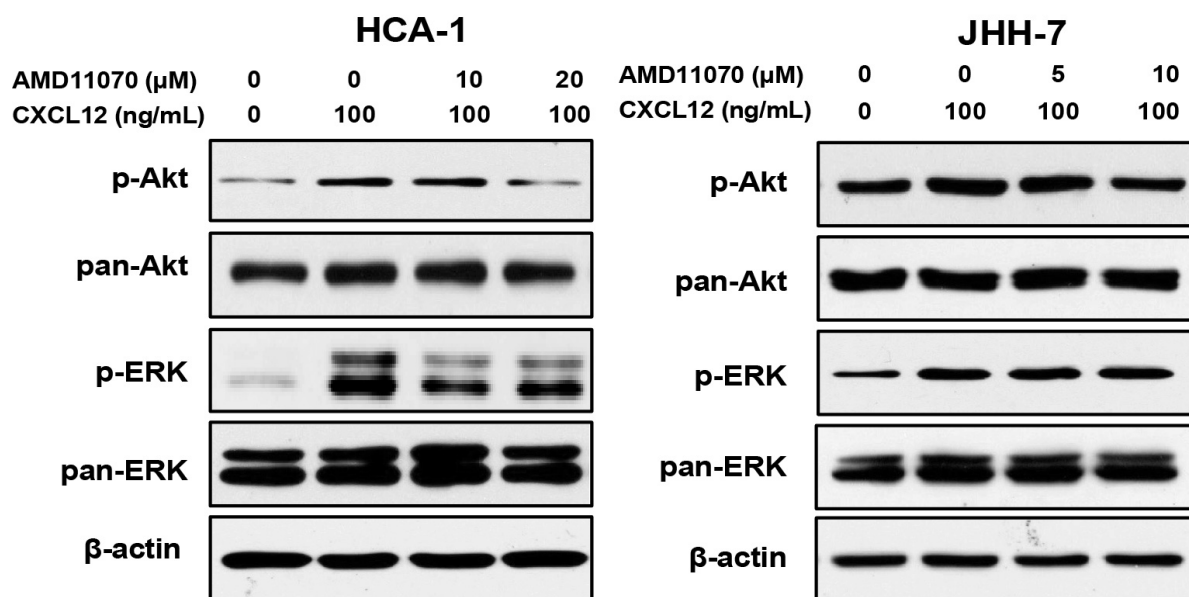

**Figure S10. AMD11070 moderately inhibited CXCL12-mediated cell signaling pathways.** Western blot analysis of phospho-ERK and phospho-AKT in HCA-1 and JHH-7 cells.

<sup>1</sup>H NMR of Linker 1

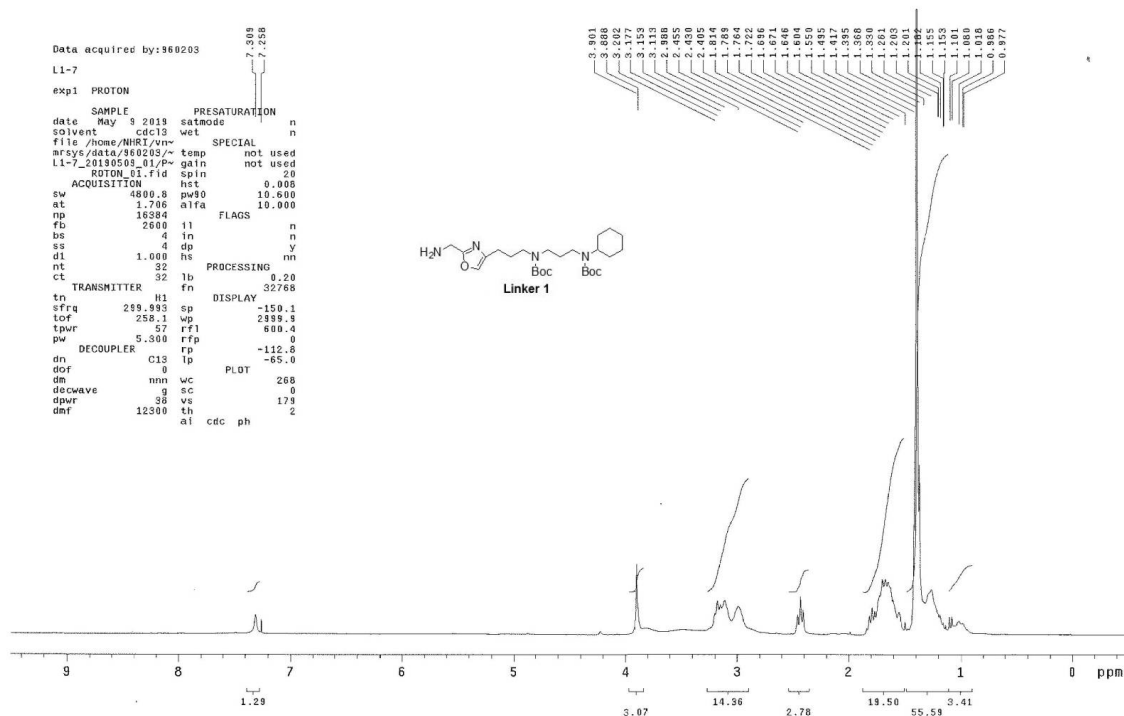

<sup>1</sup>H NMR spectrum of Linker 1

# <sup>13</sup>C NMR of Linker 1

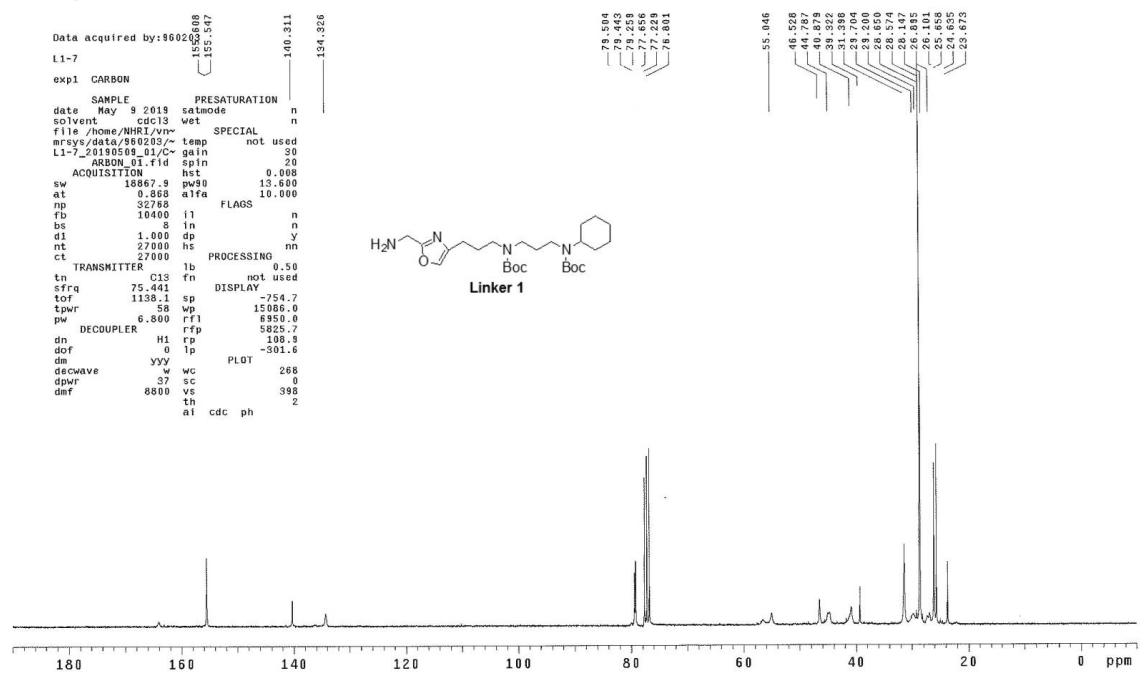

<sup>13</sup>C NMR spectrum of Linker 1

<sup>1</sup>H NMR of compound 1

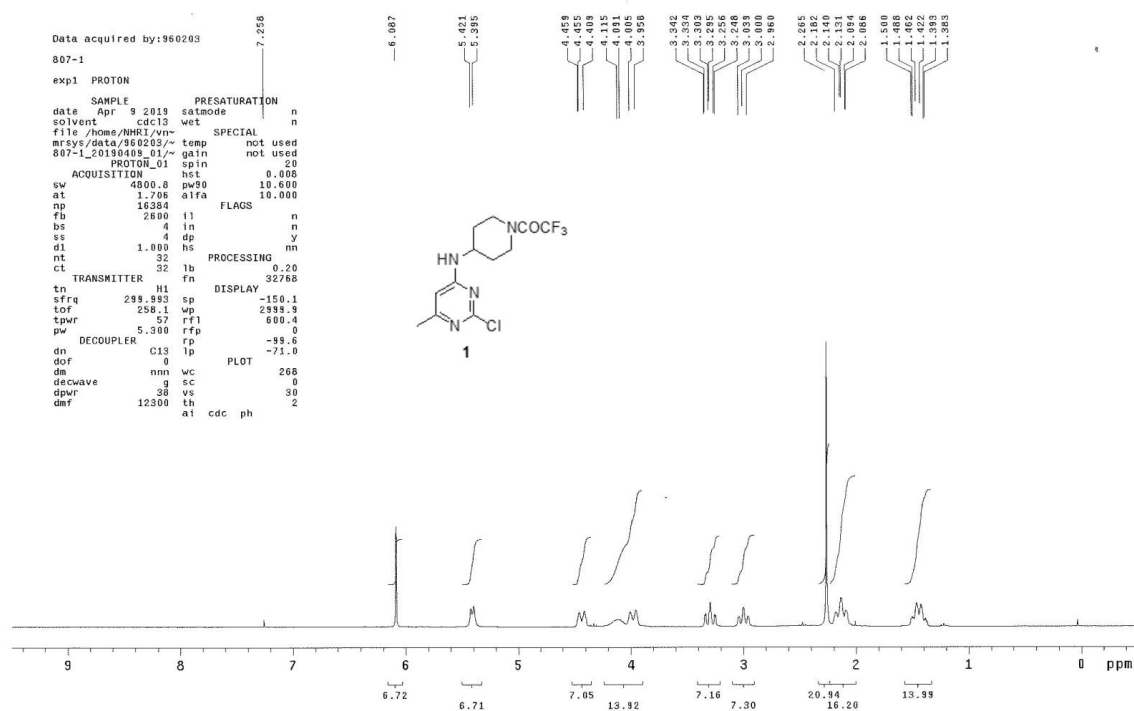

<sup>1</sup>H NMR spectrum of compound 1

<sup>13</sup>C NMR of compound 1

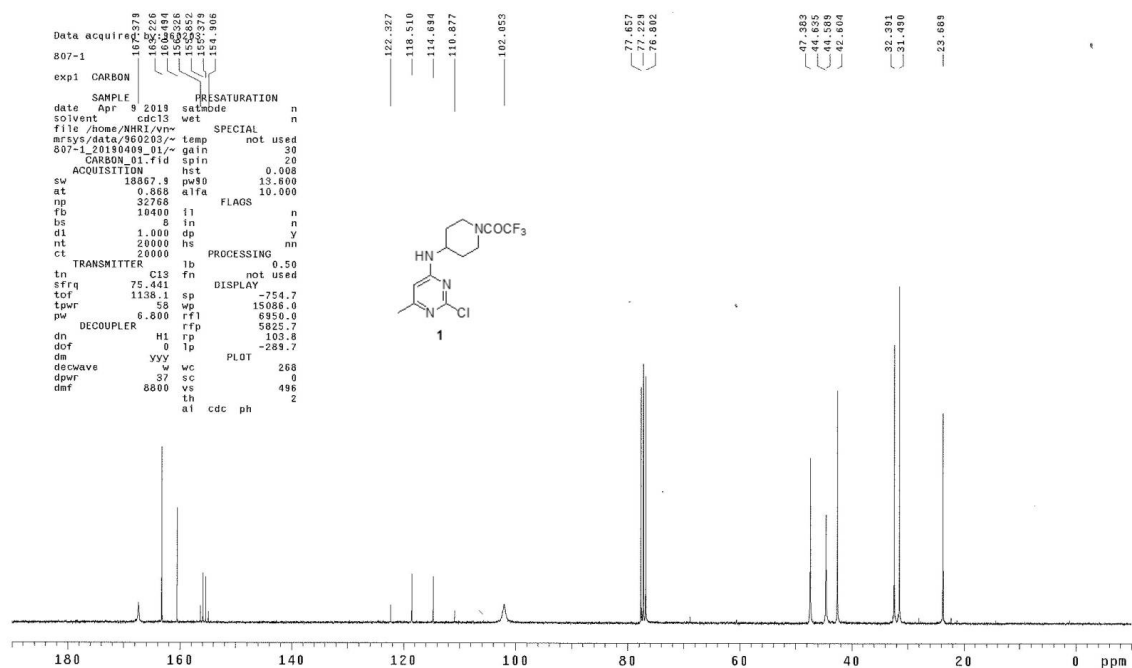

<sup>13</sup>C NMR spectrum of compound 1

<sup>1</sup>H NMR of compound 2

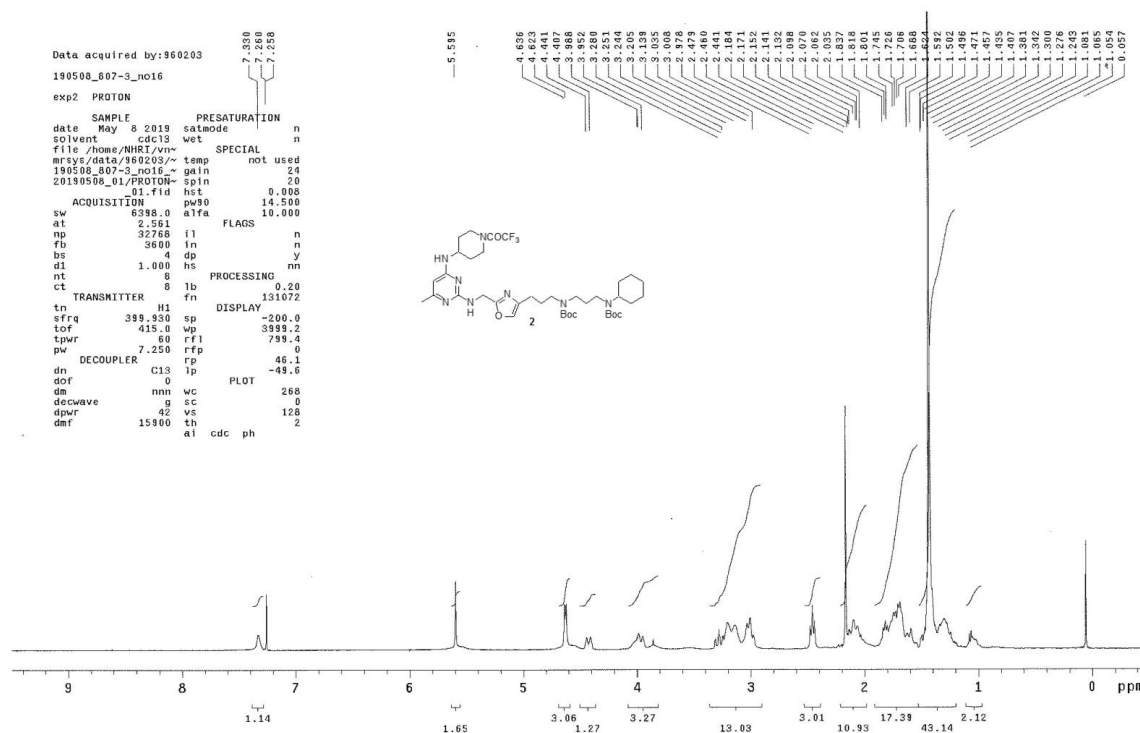

<sup>1</sup>H NMR spectrum of compound 2

exp2 CARBON

SAMPLE PRESATURATION  
 date Apr 26 2019 satmode n  
 solvent cdcl3 wet n  
 file /home/nhri/vn~ SPECIAL  
 msys/data/800205/~ temp not used  
 807-3\_20190426\_01/~ gain 30  
 CARBON\_01.fid spin 20  
 ACQUISITION hist 0.008  
 sv 18867.9 pw90 13.600  
 at 0.468 alfa 10.000  
 np 32768  
 fb 10400 ii n  
 bs 8 in n  
 dl 1.000 dp y  
 nt 30000 hs nm  
 ct 30000

TRANSMITTER  
 tn C13 fn not used  
 sfrq 75.441 DISPLAY  
 tof 1158.1 sp -754.7  
 tpwr 58 wp 15086.0  
 pw 6.800 rf1 6959.0  
 DECOUPLER rfp 5825.7  
 dn h1 rp 46.2  
 dof 0 lp -230.4  
 de yyy PLOT 268  
 decvave w wc 0  
 dpwr 37 sc 0  
 dmf 8800 ve 326  
 ai ph 1

180 160 140 120 100 80 60 40 20 0 ppb

78.412  
77.412  
77.556  
77.228  
76.001  
55.001  
47.168  
46.543  
46.543  
44.895  
44.895  
44.131  
44.131  
39.154  
39.154  
32.574  
32.574  
31.398  
31.398  
28.780  
28.780  
26.543  
26.543  
25.643  
25.643  
23.841  
23.841  
23.750

140.402  
134.097  
122.357  
118.540  
114.724  
110.307  
84.556

O=C1CCCCC1Nc2ncnc3c2n[nH]3
CC1(C)CCCC1C(=O)NCCCNCCCN(C)C(=O)C1(C)CCCC1

2

S31

<sup>1</sup>H NMR of compound 3

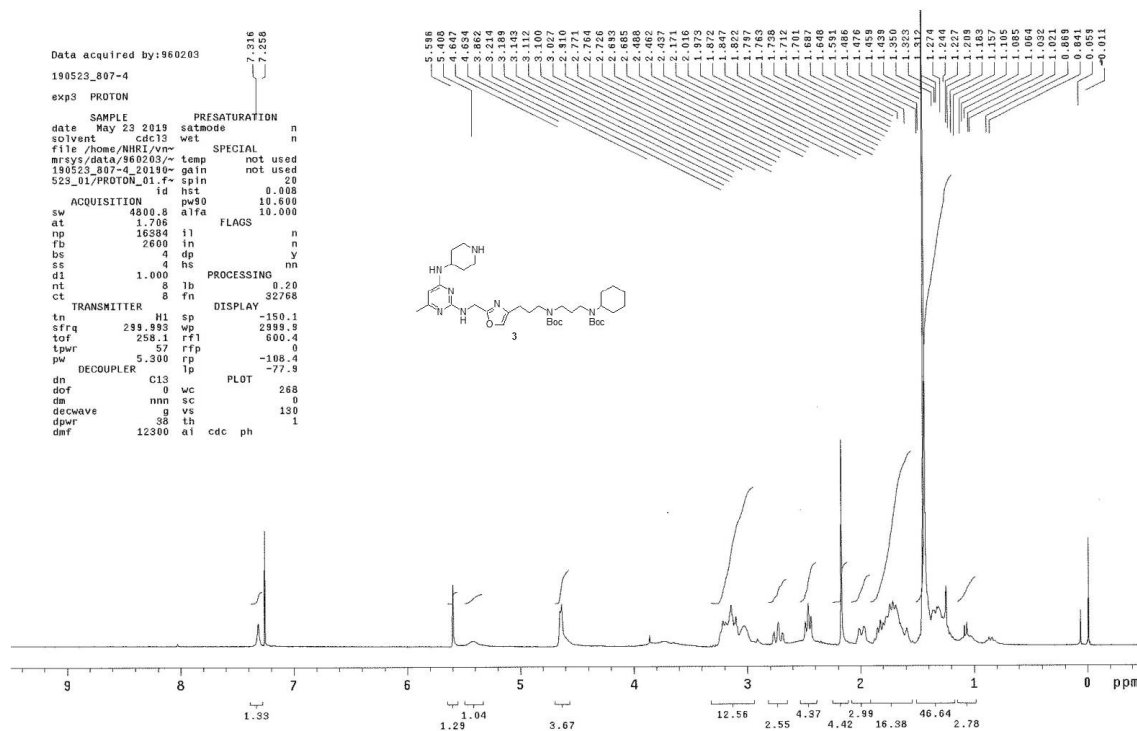

<sup>1</sup>H NMR spectrum of compound 3

<sup>13</sup>C NMR of compound 3

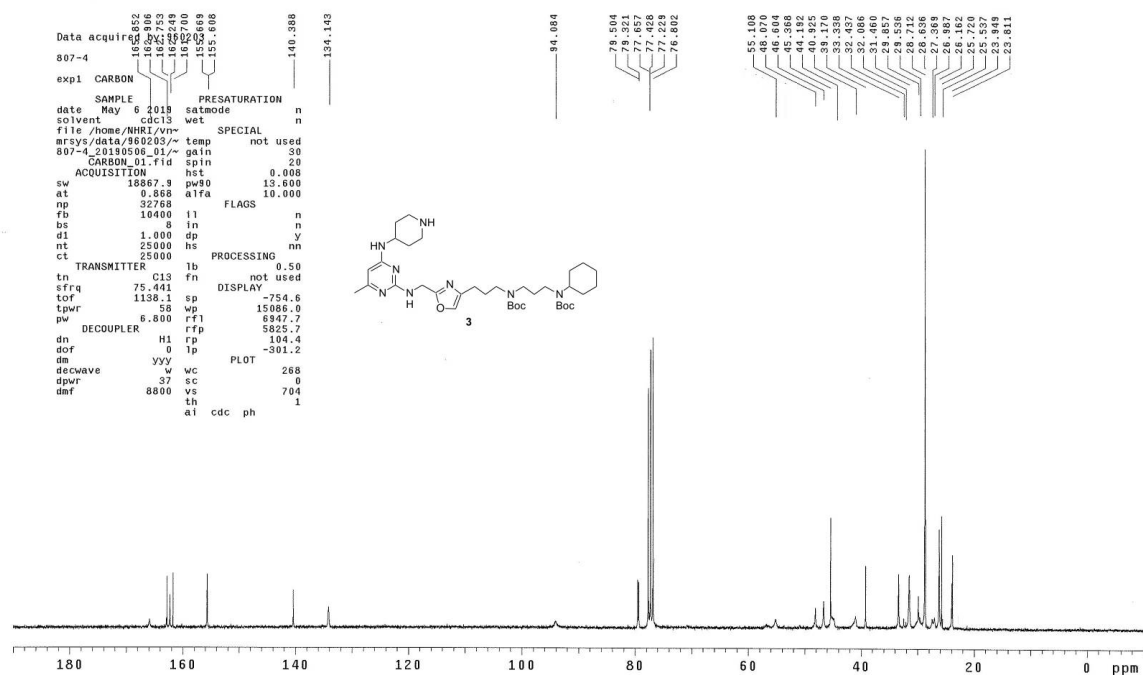

<sup>13</sup>C NMR spectrum of compound 3

<sup>1</sup>H NMR of compound 4

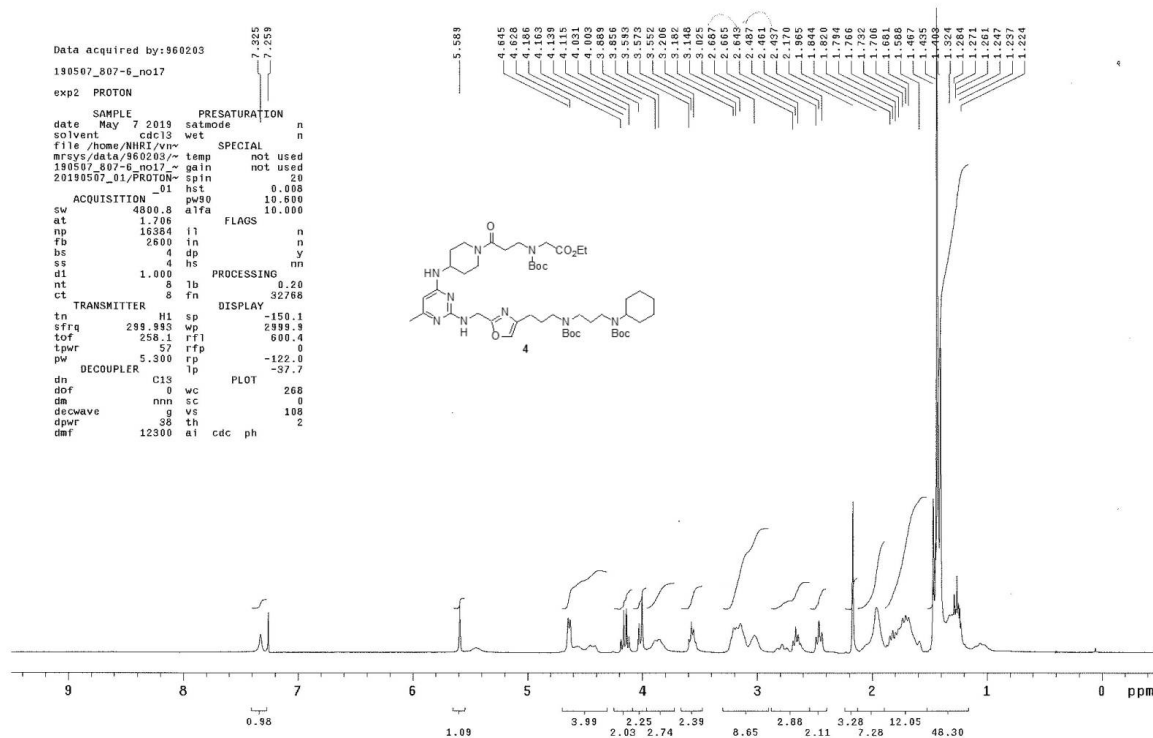

<sup>1</sup>H NMR spectrum of compound 4

[illegible] $^{13}\text{C}$  NMR spectrum of compound 4

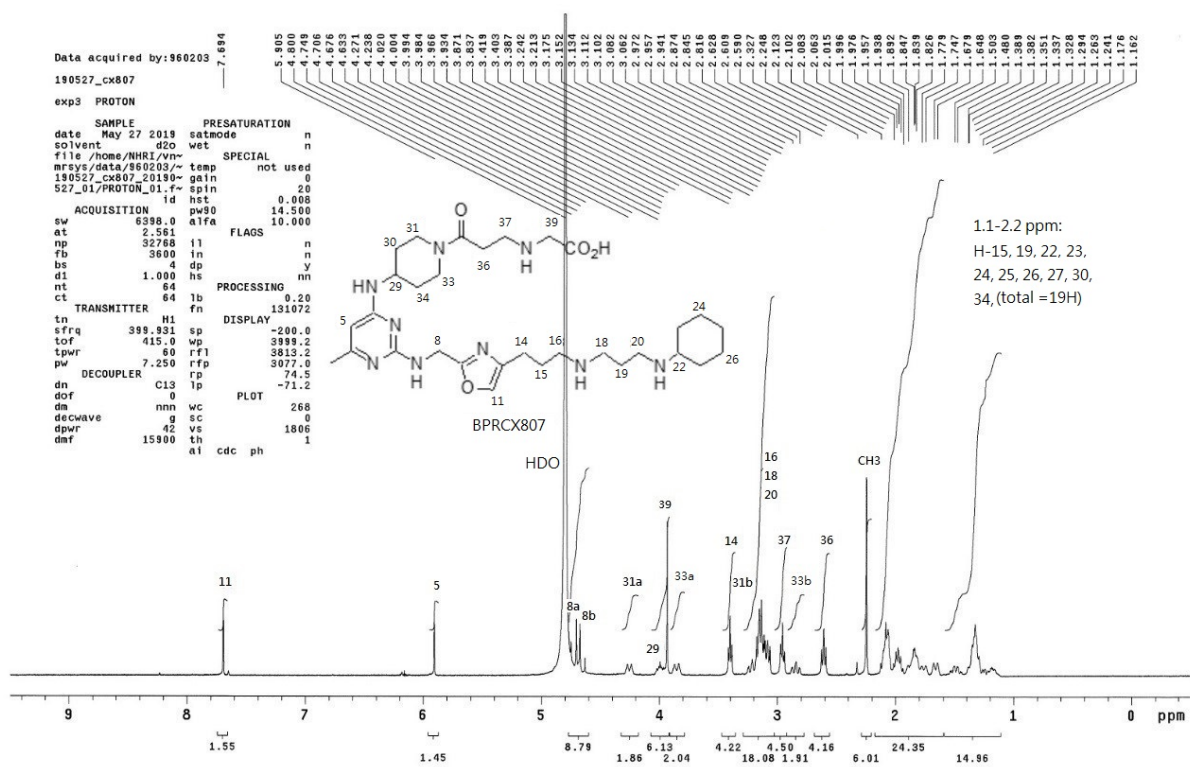

<sup>1</sup>H NMR spectrum of BPRCX807

<sup>13</sup>C NMR of BPRCX807

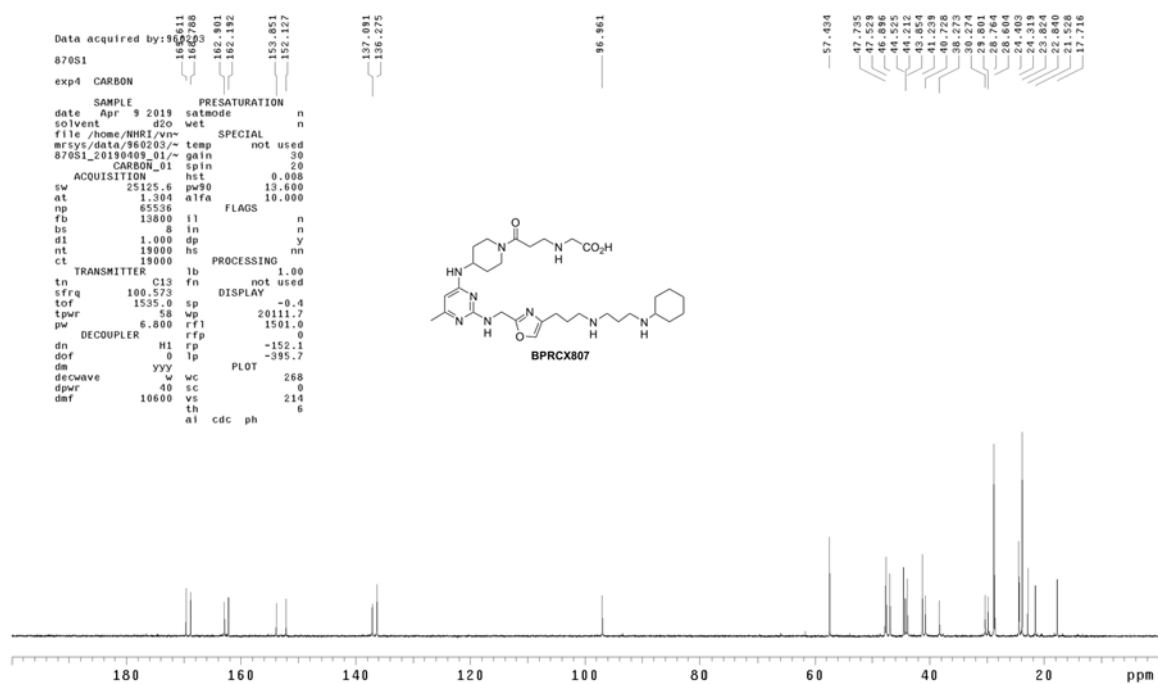

<sup>13</sup>C NMR spectrum of BPRCX807

**Diagram I.** Purity of BPRCX807 determined by analytic Method 1.

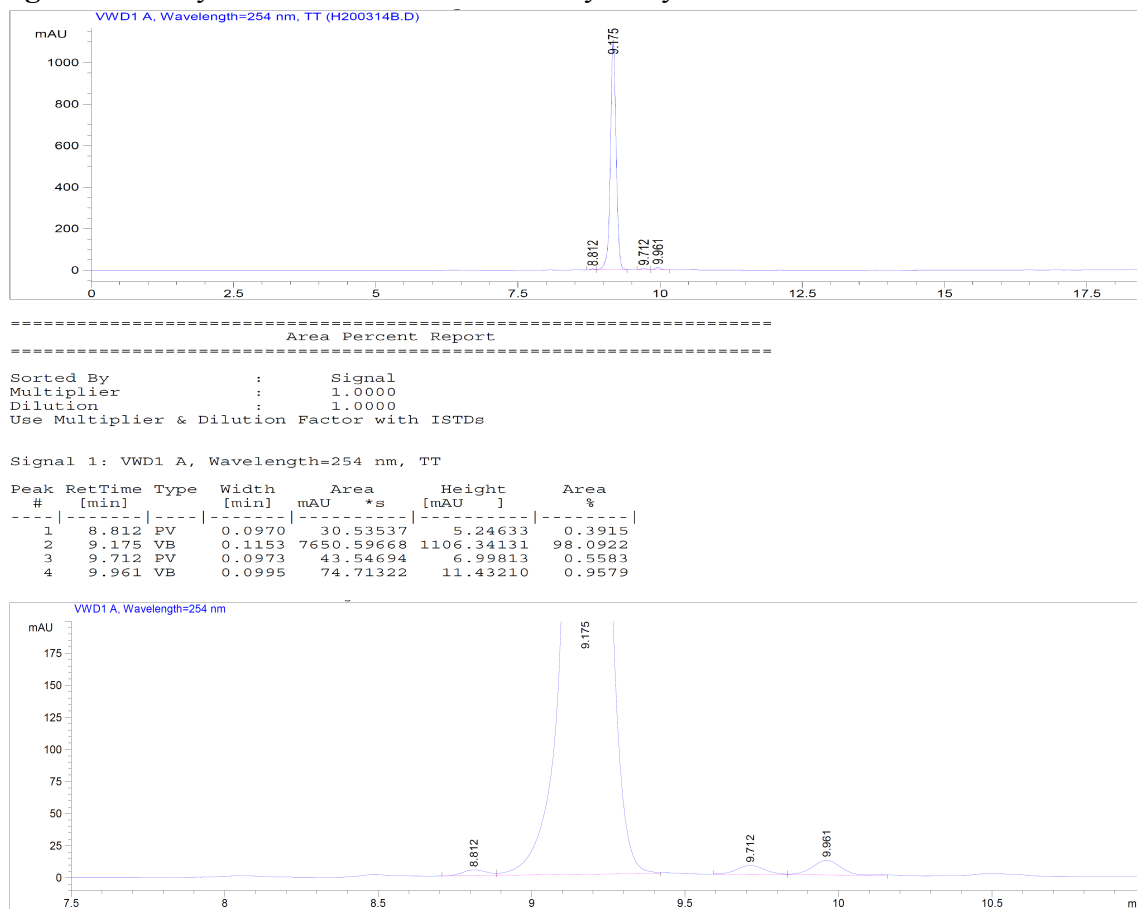

Method 1: A gradient system mixed with two eluting solvents A (water with 0.1% TFA) and B (MeOH) using a flow rate of 1 mL/min starting with 2 min at 10% solvent B, followed by a 4 min gradient of 10-50% solvent B, followed by a 10 minute gradient of 50-90% solvent B, followed by 9 min at 90% solvent B.

**Diagram II. Purity of BPRCX807 determined by analytic Method 2.**

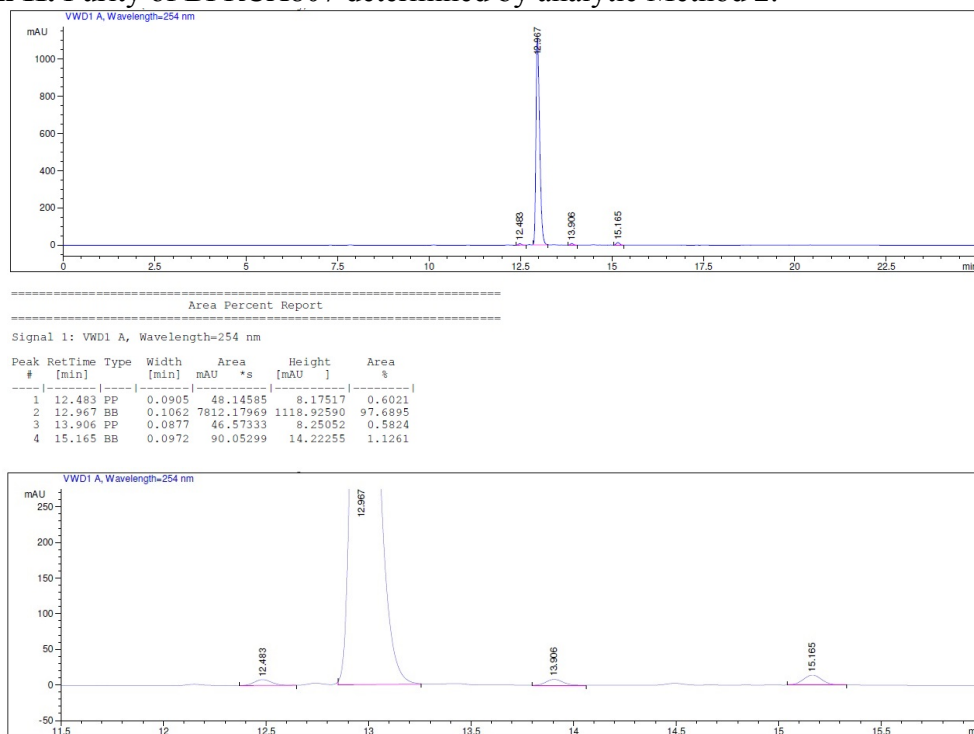

Method 2: A gradient system mixed with two eluting solvents A (water with 0.1% TFA) and B (MeOH) using a flow rate of 1 mL/min starting with 2 minute at 10% solvent B, followed by a 4 minute gradient of 10-20% solvent B, followed by a 10 minute gradient of 20-60% solvent B, followed by 9 minutes at 60% solvent B.

**Table S1.** Organ weight measurement of BPRCX807

|                     | <b>Vehicle,<br/>SC, n=5</b> | <b>BPRCX807, 50 mg/kg,<br/>SC, n=5</b> | <b>P value</b> |
|---------------------|-----------------------------|----------------------------------------|----------------|
| (g)                 | Mean $\pm$ S.D.             |                                        |                |
| Body Weight         | 326.8 $\pm$ 14.1            | 311.8 $\pm$ 15.7                       | 0.1490         |
| Liver               | 16.4419 $\pm$ 1.5350        | 14.3954 $\pm$ 2.0460                   | 0.1114         |
| Liver/B.W.          | 0.0503 $\pm$ 0.0045         | 0.0460 $\pm$ 0.0044                    | 0.1642         |
| Spleen              | 0.6643 $\pm$ 0.0680         | 0.6487 $\pm$ 0.1648                    | 0.8492         |
| Spleen/B.W.         | 0.0020 $\pm$ 0.0002         | 0.0021 $\pm$ 0.0004                    | 0.8785         |
| Kidney (2)          | 3.1582 $\pm$ 0.4988         | 2.9826 $\pm$ 0.4737                    | 0.5838         |
| Kidneys/B.W.        | 0.0097 $\pm$ 0.0014         | 0.0095 $\pm$ 0.0011                    | 0.8781         |
| Adrenal Glands (2)  | 0.0612 $\pm$ 0.0077         | 0.0612 $\pm$ 0.0083                    | 0.9908         |
| Adrenal Glands/B.W. | 0.00019 $\pm$ 0.00003       | 0.00020 $\pm$ 0.00003                  | 0.6493         |
| Thymus              | 0.7416 $\pm$ 0.0982         | 0.6705 $\pm$ 0.2266                    | 0.5375         |
| Thymus/B.W.         | 0.0023 $\pm$ 0.0002         | 0.0021 $\pm$ 0.0006                    | 0.6446         |
| Heart               | 1.2836 $\pm$ 0.1619         | 1.1704 $\pm$ 0.1340                    | 0.2629         |
| Heart/B.W.          | 0.0039 $\pm$ 0.0004         | 0.0038 $\pm$ 0.0004                    | 0.5197         |
| Lung                | 1.6794 $\pm$ 0.3847         | 1.6847 $\pm$ 0.1313                    | 0.9776         |
| Lung/B.W.           | 0.0051 $\pm$ 0.0012         | 0.0054 $\pm$ 0.0005                    | 0.6410         |
| Testes (2)          | 2.9324 $\pm$ 0.1515         | 2.9421 $\pm$ 0.2476                    | 0.9420         |
| Testes/B.W.         | 0.0090 $\pm$ 0.0008         | 0.0094 $\pm$ 0.0006                    | 0.3401         |

**Table S2.** Hematology analysis of BPRCX807

|                                                       | <b>Vehicle,<br/>SC, n=5</b> | <b>BPRCX807, 50<br/>mg/kg, SC, n=5</b> | <b>P value</b> |
|-------------------------------------------------------|-----------------------------|----------------------------------------|----------------|
|                                                       | Mean $\pm$ S.D.             |                                        |                |
| White blood cells ( $10^3/\mu\text{L}$ )              | 8.15 $\pm$ 4.03             | 10.75 $\pm$ 6.09                       | 0.4486         |
| Neutrophil ( $10^3/\mu\text{L}$ )                     | 2.67 $\pm$ 1.83             | 3.75 $\pm$ 2.13                        | 0.4182         |
| Lymphocyte ( $10^3/\mu\text{L}$ )                     | 4.96 $\pm$ 2.01             | 6.36 $\pm$ 3.70                        | 0.4794         |
| Monocyte ( $10^3/\mu\text{L}$ )                       | 0.49 $\pm$ 0.23             | 0.63 $\pm$ 0.36                        | 0.4939         |
| Eosinophil ( $10^3/\mu\text{L}$ )                     | 0.01 $\pm$ 0.01             | 0.01 $\pm$ 0.01                        | 0.7924         |
| Basophil ( $10^3/\mu\text{L}$ )                       | 0.002 $\pm$ 0.004           | 0.002 $\pm$ 0.004                      | 1.0000         |
| Neutrophil %                                          | 29.80 $\pm$ 8.10            | 35.11 $\pm$ 5.51                       | 0.2602         |
| Lymphocyte %                                          | 63.80 $\pm$ 8.35            | 58.95 $\pm$ 6.42                       | 0.3333         |
| Monocyte %                                            | 6.22 $\pm$ 1.46             | 5.82 $\pm$ 1.11                        | 0.6423         |
| Eosinophil %                                          | 0.14 $\pm$ 0.13             | 0.11 $\pm$ 0.05                        | 0.6773         |
| Basophil %                                            | 0.04 $\pm$ 0.05             | 0.01 $\pm$ 0.02                        | 0.2495         |
| Erythrocyte ( $10^6/\mu\text{L}$ )                    | 6.47 $\pm$ 0.35             | 6.33 $\pm$ 0.45                        | 0.5861         |
| Hemoglobin (g/dL)                                     | 13.9 $\pm$ 1.0              | 13.8 $\pm$ 0.9                         | 0.8190         |
| Hematocrit (g/dL)                                     | 41.2 $\pm$ 1.3              | 41.4 $\pm$ 3.5                         | 0.9077         |
| Mean corpuscle volume (fL)                            | 63.7 $\pm$ 1.9              | 65.4 $\pm$ 2.7                         | 0.2876         |
| Mean corpuscle hemoglobin (pg)                        | 21.5 $\pm$ 0.7              | 21.8 $\pm$ 1.0                         | 0.6059         |
| Mean corpuscle hemoglobin concentration (MCHC) (g/dL) | 33.7 $\pm$ 1.4              | 33.3 $\pm$ 1.5                         | 0.6681         |
| Red blood cell distribution width (%)                 | 15.1 $\pm$ 0.6              | 15.1 $\pm$ 0.5                         | 0.9570         |
| Platelet ( $10^3/\mu\text{L}$ )                       | 1195 $\pm$ 207              | 1327 $\pm$ 239                         | 0.3758         |
| Mean platelet volume (fL)                             | 6.4 $\pm$ 0.3               | 6.4 $\pm$ 0.1                          | 1.0000         |

**Table S3.** Biochemistry analysis of BPRCX807

|                                                 | <b>Vehicle,<br/>SC, n=5</b> | <b>BPRCX807, 50<br/>mg/kg,<br/>SC, n=5</b> | <b>P value</b> |
|-------------------------------------------------|-----------------------------|--------------------------------------------|----------------|
|                                                 | Mean $\pm$ S.D.             |                                            |                |
| Glutamate oxaloacetate transaminase (GOT) (U/L) | 78 $\pm$ 26                 | 67 $\pm$ 7                                 | 0.4086         |
| Glutamate pyruvate transaminase (GPT) (U/L)     | 37 $\pm$ 3                  | 35 $\pm$ 5                                 | 0.4298         |
| Lactate dehydrogenase (LDH) (U/L)               | 863 $\pm$ 1279              | 272 $\pm$ 132                              | 0.3337         |
| Alkaline Phosphatase (ALP) (U/L)                | 1133 $\pm$ 337              | 901 $\pm$ 60                               | 0.1694         |
| Blood Urea Nitrogen (BUN) (mg/dL)               | 16.2 $\pm$ 1.8              | 16.7 $\pm$ 2.1                             | 0.6966         |
| Creatinine (CRE) (mg/dL)                        | 0.20 $\pm$ 0.07             | 0.22 $\pm$ 0.04                            | 0.6075         |
| Albumin (ALB) (g/dL)                            | 3.9 $\pm$ 0.3               | 4.0 $\pm$ 0.2                              | 0.4676         |

**Table S4.** 67 off-target standard assays of BPRCX807

| Cat #                                 | Assay Name                                 | Batch* | Spec. | Rep. | Conc. | % Inh. |
|---------------------------------------|--------------------------------------------|--------|-------|------|-------|--------|
| <b>Compound: CX807, PT #: 1218479</b> |                                            |        |       |      |       |        |
| 200510                                | Adenosine A <sub>1</sub>                   | 421425 | hum   | 2    | 10 µM | 2      |
| 200610                                | Adenosine A <sub>2A</sub>                  | 421426 | hum   | 2    | 10 µM | 4      |
| 200720                                | Adenosine A <sub>3</sub>                   | 421407 | hum   | 2    | 10 µM | 20     |
| 203100                                | Adrenergic α <sub>1A</sub>                 | 421531 | rat   | 2    | 10 µM | 13     |
| 203200                                | Adrenergic α <sub>1B</sub>                 | 421532 | rat   | 2    | 10 µM | 10     |
| 203400                                | Adrenergic α <sub>1D</sub>                 | 421409 | hum   | 2    | 10 µM | 20     |
| 203630                                | Adrenergic α <sub>2A</sub>                 | 421427 | hum   | 2    | 10 µM | 16     |
| 204010                                | Adrenergic β <sub>1</sub>                  | 421491 | hum   | 2    | 10 µM | 4      |
| 204110                                | Adrenergic β <sub>2</sub>                  | 421428 | hum   | 2    | 10 µM | 1      |
| 206000                                | Androgen (Testosterone)                    | 421561 | hum   | 2    | 10 µM | 1      |
| 212520                                | Bradykinin B <sub>1</sub>                  | 421593 | hum   | 2    | 10 µM | 62     |
| 212620                                | Bradykinin B <sub>2</sub>                  | 421424 | hum   | 2    | 10 µM | -7     |
| 214510                                | Calcium Channel L-Type, Benzothiazepine    | 421527 | rat   | 2    | 10 µM | 12     |
| 214600                                | Calcium Channel L-Type, Dihydropyridine    | 421415 | rat   | 2    | 10 µM | 10     |
| 216000                                | Calcium Channel N-Type                     | 421585 | rat   | 2    | 10 µM | 35     |
| 217030                                | Cannabinoid CB <sub>1</sub>                | 421534 | hum   | 2    | 10 µM | 5      |
| 219500                                | Dopamine D <sub>1</sub>                    | 421729 | hum   | 2    | 10 µM | 7      |
| 219700                                | Dopamine D <sub>2S</sub>                   | 421451 | hum   | 2    | 10 µM | 13     |
| 219800                                | Dopamine D <sub>3</sub>                    | 421564 | hum   | 2    | 10 µM | 58     |
| 219900                                | Dopamine D <sub>4.2</sub>                  | 421461 | hum   | 2    | 10 µM | 6      |
| 224010                                | Endothelin ET <sub>A</sub>                 | 421459 | hum   | 2    | 10 µM | 0      |
| 224110                                | Endothelin ET <sub>B</sub>                 | 421414 | hum   | 2    | 10 µM | 4      |
| 225510                                | Epidermal Growth Factor (EGF)              | 421529 | hum   | 2    | 10 µM | -6     |
| 226010                                | Estrogen ERα                               | 421462 | hum   | 2    | 10 µM | -8     |
| 226600                                | GABA <sub>A</sub> , Flunitrazepam, Central | 421435 | rat   | 2    | 10 µM | 3      |
| 226500                                | GABA <sub>A</sub> , Muscimol, Central      | 421464 | rat   | 2    | 10 µM | -9     |
| 228610                                | GABA <sub>B1A</sub>                        | 421723 | hum   | 2    | 10 µM | -1     |
| 232030                                | Glucocorticoid                             | 421493 | hum   | 2    | 10 µM | 0      |
| 232710                                | Glutamate, Kainate                         | 421468 | rat   | 2    | 10 µM | -9     |
| 232810                                | Glutamate, NMDA, Agonism                   | 421465 | rat   | 2    | 10 µM | 0      |
| 232910                                | Glutamate, NMDA, Glycine                   | 421466 | rat   | 2    | 10 µM | -5     |
| 233000                                | Glutamate, NMDA, Phencyclidine             | 421430 | rat   | 2    | 10 µM | -15    |
| 239610                                | Histamine H <sub>1</sub>                   | 421537 | hum   | 2    | 10 µM | 0      |
| 239710                                | Histamine H <sub>2</sub>                   | 421488 | hum   | 2    | 10 µM | -7     |

Note: Items meeting criteria for significance (≥50% stimulation or inhibition) are highlighted.

\* Batch: Represents compounds tested concurrently in the same assay(s).

ham=Hamster; hum=Human

| Cat #  | Assay Name                                            | Batch* | Spec.  | Rep. | Conc. | % Inh. |
|--------|-------------------------------------------------------|--------|--------|------|-------|--------|
| 239820 | Histamine H <sub>3</sub>                              | 421431 | hum    | 2    | 10 µM | 18     |
| 241000 | Imidazoline I <sub>2</sub> , Central                  | 421538 | rat    | 2    | 10 µM | 16     |
| 250460 | Leukotriene, Cysteinyl CysLT <sub>1</sub>             | 421485 | hum    | 2    | 10 µM | 1      |
| 251600 | Melatonin MT <sub>1</sub>                             | 421486 | hum    | 2    | 10 µM | -7     |
| 252610 | Muscarinic M <sub>1</sub>                             | 421401 | hum    | 2    | 10 µM | 11     |
| 252710 | Muscarinic M <sub>2</sub>                             | 421402 | hum    | 2    | 10 µM | 31     |
| 252810 | Muscarinic M <sub>3</sub>                             | 421403 | hum    | 2    | 10 µM | 6      |
| 257010 | Neuropeptide Y Y <sub>1</sub>                         | 421419 | hum    | 2    | 10 µM | 11     |
| 257110 | Neuropeptide Y Y <sub>2</sub>                         | 421420 | hum    | 2    | 10 µM | 5      |
| 258590 | Nicotinic Acetylcholine                               | 421539 | hum    | 2    | 10 µM | 3      |
| 258700 | Nicotinic Acetylcholine α <sub>1</sub> , Bungarotoxin | 421489 | hum    | 2    | 10 µM | 12     |
| 260130 | Opiate δ <sub>1</sub> (OP1, DOP)                      | 421406 | hum    | 2    | 10 µM | 7      |
| 260210 | Opiate κ (OP2, KOP)                                   | 421477 | hum    | 2    | 10 µM | 27     |
| 260410 | Opiate μ (OP3, MOP)                                   | 421543 | hum    | 2    | 10 µM | 8      |
| 264500 | Phorbol Ester                                         | 421435 | mouse  | 2    | 10 µM | 3      |
| 265010 | Platelet Activating Factor (PAF)                      | 421652 | hum    | 2    | 10 µM | 23     |
| 265600 | Potassium Channel [K <sub>ATP</sub> ]                 | 421547 | ham    | 2    | 10 µM | 2      |
| 265900 | Potassium Channel hERG                                | 421548 | hum    | 2    | 10 µM | 12     |
| 268420 | Prostanoid EP <sub>4</sub>                            | 421549 | hum    | 2    | 10 µM | 5      |
| 268700 | Purinergic P2X                                        | 421524 | rabbit | 2    | 10 µM | 3      |
| 268810 | Purinergic P2Y                                        | 421596 | rat    | 2    | 10 µM | 2      |
| 270000 | Rolipram                                              | 421413 | rat    | 2    | 10 µM | 2      |
| 271110 | Serotonin (5-Hydroxytryptamine) 5-HT <sub>1A</sub>    | 421473 | hum    | 2    | 10 µM | 0      |
| 271700 | Serotonin (5-Hydroxytryptamine) 5-HT <sub>2B</sub>    | 421550 | hum    | 2    | 10 µM | 8      |
| 271910 | Serotonin (5-Hydroxytryptamine) 5-HT <sub>3</sub>     | 421437 | hum    | 2    | 10 µM | 3      |
| 278110 | Sigma σ <sub>1</sub>                                  | 421551 | hum    | 2    | 10 µM | 5      |
| 279510 | Sodium Channel, Site 2                                | 421552 | rat    | 2    | 10 µM | -3     |
| 255520 | Tachykinin NK <sub>1</sub>                            | 421472 | hum    | 2    | 10 µM | 3      |
| 285900 | Thyroid Hormone                                       | 421482 | rat    | 2    | 10 µM | -9     |
| 220320 | Transporter, Dopamine (DAT)                           | 421492 | hum    | 2    | 10 µM | 48     |
| 226400 | Transporter, GABA                                     | 421594 | rat    | 2    | 10 µM | 1      |
| 204410 | Transporter, Norepinephrine (NET)                     | 421553 | hum    | 2    | 10 µM | 25     |
| 274030 | Transporter, Serotonin (5-Hydroxytryptamine) (SERT)   | 421445 | hum    | 2    | 10 µM | 10     |

Note: Items meeting criteria for significance (≥50% stimulation or inhibition) are highlighted.

\* Batch: Represents compounds tested concurrently in the same assay(s).

ham=Hamster; hum=Human

**Table S5.** *hERG* patch-clamp assay of BPRCX807

| Tested [C]  | 100 $\mu$ M | 10 $\mu$ M | 1 $\mu$ M |
|-------------|-------------|------------|-----------|
| Inhibition% | 17.4%       | 9.0%       | 13.8%     |

**Table S6.** Selectivity screening of various chemokine receptors

| assay target | efficacy (%) <sup>a</sup> | assay target | efficacy (%) <sup>a</sup> |
|--------------|---------------------------|--------------|---------------------------|
| CCR1         | 0                         | CCR10        | 0                         |
| CCR2         | -3                        | CX3CR1       | 3                         |
| CCR3         | 4                         | CXCR1        | 10                        |
| CCR4         | 1                         | CXCR2        | 5                         |
| CCR5         | 1                         | CXCR3        | 6                         |
| CCR6         | -8                        | CXCR4        | 101                       |
| CCR7         | -6                        | CXCR5        | -9                        |
| CCR8         | -9                        | CXCR6        | 6                         |
| CCR9         | -8                        | CXCR7        | -20                       |

<sup>a</sup>Percent inhibition was determined in the GPCR  $\beta$ -arrestin assay at a concentration of 10  $\mu$ M and very weak inhibition (-20~10%) was observed for all tested chemokine receptors except CXCR4 (101%).
